# Supplementary material for: MITF-Independent Pro-Survival Role of BRG1-Containing SWI/SNF Complex in Melanoma Cells
Source: PubMed Central journal article supplement (PMC3547967; doi:10.1371/journal.pone.0054110), 2013-01-17
Supplement: pone.0054110.s004.pdf [file pone.0054110.s004.pdf]

Supplementary Table S1. Microarray analysis of genes down-regulated &gt;2-fold (P&lt;0.005) by Brg1 depletion in 501mel cells.

| Gene Symbol     | Systematic Name | Gene Title                                                                                                                                                                                                                          | Fold change |
|-----------------|-----------------|-------------------------------------------------------------------------------------------------------------------------------------------------------------------------------------------------------------------------------------|-------------|
| SLAMF7          | NM_021181       | ref Homo sapiens SLAM family member 7 (SLAMF7), mRNA [NM_021181]                                                                                                                                                                    | 34.23       |
| HTN1            | NM_002159       | ref Homo sapiens histatin 1 (HTN1), mRNA [NM_002159]                                                                                                                                                                                | 23.30       |
| DCT             | NM_001922       | ref Homo sapiens dopachrome tautomerase (dopachrome delta-isomerase, tyrosine-related protein 2) (DCT), transcript variant 1, mRNA [NM_001922]                                                                                      | 22.50       |
| U88896          | U88896          | gb Human endogenous retrovirus H protease/integrase-derived ORF1, ORF2, and putative envelope protein mRNA, complete cds. [U88896]                                                                                                  | 20.49       |
| DCT             | NM_001922       | ref Homo sapiens dopachrome tautomerase (dopachrome delta-isomerase, tyrosine-related protein 2) (DCT), transcript variant 1, mRNA [NM_001922]                                                                                      | 19.45       |
| GPC5            | NM_004466       | ref Homo sapiens glypican 5 (GPC5), mRNA [NM_004466]                                                                                                                                                                                | 19.44       |
| PAEP            | NM_002571       | ref Homo sapiens progesterone-associated endometrial protein (PAEP), transcript variant 2, mRNA [NM_002571]                                                                                                                         | 18.93       |
| PCSK9           | NM_174936       | ref Homo sapiens proprotein convertase subtilisin/kexin type 9 (PCSK9), mRNA [NM_174936]                                                                                                                                            | 18.43       |
| PPY             | NM_002722       | ref Homo sapiens pancreatic polypeptide (PPY), mRNA [NM_002722]                                                                                                                                                                     | 17.89       |
| MS4A15          | NM_152717       | ref Homo sapiens membrane-spanning 4-domains, subfamily A, member 15 (MS4A15), transcript variant 2, mRNA [NM_152717]                                                                                                               | 17.39       |
| TPD52L1         | NM_001003395    | ref Homo sapiens tumor protein D52-like 1 (TPD52L1), transcript variant 2, mRNA [NM_001003395]                                                                                                                                      | 16.78       |
| TRPM1           | NM_002420       | ref Homo sapiens transient receptor potential cation channel, subfamily M, member 1 (TRPM1), mRNA [NM_002420]                                                                                                                       | 15.98       |
| SLAMF9          | NM_033438       | ref Homo sapiens SLAM family member 9 (SLAMF9), mRNA [NM_033438]                                                                                                                                                                    | 15.86       |
| THC2708669      | THC2708669      | thc Q3IE62_PSEHT (Q3IE62) Dihydroteroaate synthase (DHPS) (Dihydroteroaate pyrophosphorylase) , partial (5%) [THC2708669]                                                                                                           | 13.99       |
| SLC5A10         | NM_152351       | ref Homo sapiens solute carrier family 5 (sodium/glucose cotransporter), member 10 (SLC5A10), transcript variant 1, mRNA [NM_152351]                                                                                                | 13.48       |
| CEACAM1         | NM_001712       | ref Homo sapiens carcinoembryonic antigen-related cell adhesion molecule 1 (biliary glycoprotein) (CEACAM1), transcript variant 1, mRNA [NM_001712]                                                                                 | 13.14       |
| ROPN1           | NM_017578       | ref Homo sapiens ropporin, rhophilin associated protein 1 (ROPN1), mRNA [NM_017578]                                                                                                                                                 | 12.09       |
| TGFB2           | NM_001135599    | ref Homo sapiens transforming growth factor, beta 2 (TGFB2), transcript variant 1, mRNA [NM_001135599]                                                                                                                              | 12.04       |
| TKTL1           | NM_012253       | ref Homo sapiens transketolase-like 1 (TKTL1), mRNA [NM_012253]                                                                                                                                                                     | 11.97       |
| LOC100128682    | AK128099        | gb Homo sapiens cDNA FLJ46220 fis, clone TESTI4013774. [AK128099]                                                                                                                                                                   | 11.43       |
| PRDM9           | NM_020227       | ref Homo sapiens PR domain containing 9 (PRDM9), mRNA [NM_020227]                                                                                                                                                                   | 11.26       |
| CEACAM1         | NM_001024912    | ref Homo sapiens carcinoembryonic antigen-related cell adhesion molecule 1 (biliary glycoprotein) (CEACAM1), transcript variant 2, mRNA [NM_001024912]                                                                              | 11.26       |
| FUT3            | NM_000149       | ref Homo sapiens fucosyltransferase 3 (galactoside 3(4)-L-fucosyltransferase, Lewis blood group) (FUT3), transcript variant 1, mRNA [NM_000149]                                                                                     | 11.12       |
| BC007940        | BC007940        | gb Homo sapiens cDNA clone IMAGE:4131853. **** WARNING: chimeric clone ****. [BC007940]                                                                                                                                             | 11.03       |
| CRYAB           | NM_001885       | ref Homo sapiens crystallin, alpha B (CRYAB), mRNA [NM_001885]                                                                                                                                                                      | 10.80       |
| MLANA           | NM_005511       | ref Homo sapiens melan-A (MLANA), mRNA [NM_005511]                                                                                                                                                                                  | 10.76       |
| PCCA            | NM_000282       | ref Homo sapiens propionyl Coenzyme A carboxylase, alpha polypeptide (PCCA), nuclear gene encoding mitochondrial protein, transcript variant 1, mRNA [NM_000282]                                                                    | 10.69       |
| LOC646241       | BC028204        | gb Homo sapiens cDNA clone IMAGE:5201079. [BC028204]                                                                                                                                                                                | 10.41       |
| C1orf170        | AK123855        | gb Homo sapiens cDNA FLJ41861 fis, clone NTONG2008672. [AK123855]                                                                                                                                                                   | 10.37       |
| CNDP1           | NM_032649       | ref Homo sapiens carnosine dipeptidase 1 (metallopeptidase M20 family) (CNDP1), mRNA [NM_032649]                                                                                                                                    | 10.28       |
| SPINK1          | NM_003122       | ref Homo sapiens serine peptidase inhibitor, Kazal type 1 (SPINK1), mRNA [NM_003122]                                                                                                                                                | 10.19       |
| SLC7A4          | NM_004173       | ref Homo sapiens solute carrier family 7 (cationic amino acid transporter, y+ system), member 4 (SLC7A4), mRNA [NM_004173]                                                                                                          | 10.17       |
| GCNT3           | ENST00000287857 | ens Beta-1,3-galactosyl-O-glycosyl-glycoprotein beta-1,6-N-acetylglucosaminyltransferase 3 (EC 2.4.1.102)(EC 2.4.1.150)(Core 2/core 4 beta-1,6-N-acetylglucosyltransferase 3) (GCNT3), transcript variant 1, mRNA [ENST00000287857] | 9.93        |
| ATP6V00A4       | NM_020632       | ref Homo sapiens ATPase, H+ transporting, lysosomal V0 subunit a4 (ATP6V00A4), transcript variant 1, mRNA [NM_020632]                                                                                                               | 9.91        |
| C1orf170        | AK123855        | gb Homo sapiens cDNA FLJ41861 fis, clone NTONG2008672. [AK123855]                                                                                                                                                                   | 9.77        |
| C6orf142        | NM_138569       | ref Homo sapiens chromosome 6 open reading frame 142 (C6orf142), mRNA [NM_138569]                                                                                                                                                   | 9.71        |
| S100A1          | NM_006271       | ref Homo sapiens S100 calcium binding protein A1 (S100A1), mRNA [NM_006271]                                                                                                                                                         | 9.65        |
| HILS1           | NR_024193       | ref Homo sapiens histone linker H1 domain, spermatid-specific 1 (HILS1), transcript variant 1, non-coding RNA [NR_024193]                                                                                                           | 9.62        |
| SPATS1          | NM_145026       | ref Homo sapiens spermatogenesis associated, serine-rich 1 (SPATS1), mRNA [NM_145026]                                                                                                                                               | 9.47        |
| IGF1            | NM_000618       | ref Homo sapiens insulin-like growth factor 1 (somatomedin C) (IGF1), transcript variant 4, mRNA [NM_000618]                                                                                                                        | 9.41        |
| CYP19A1         | NM_031226       | ref Homo sapiens cytochrome P450, family 19, subfamily A, polypeptide 1 (CYP19A1), transcript variant 2, mRNA [NM_031226]                                                                                                           | 9.29        |
| IGF1            | NM_000618       | ref Homo sapiens insulin-like growth factor 1 (somatomedin C) (IGF1), transcript variant 4, mRNA [NM_000618]                                                                                                                        | 9.23        |
| OSBPL10         | NM_017784       | ref Homo sapiens oxysterol binding protein-like 10 (OSBPL10), mRNA [NM_017784]                                                                                                                                                      | 9.19        |
| IGF1            | NM_000618       | ref Homo sapiens insulin-like growth factor 1 (somatomedin C) (IGF1), transcript variant 4, mRNA [NM_000618]                                                                                                                        | 9.17        |
| RASEF           | NM_152573       | ref Homo sapiens RAS and EF-hand domain containing (RASEF), mRNA [NM_152573]                                                                                                                                                        | 8.96        |
| BC014971        | BC014971        | gb Homo sapiens, Similar to tubulin, beta, 2, clone IMAGE:4873024, mRNA [BC014971]                                                                                                                                                  | 8.94        |
| CA9             | NM_001216       | ref Homo sapiens carbonic anhydrase IX (CA9), mRNA [NM_001216]                                                                                                                                                                      | 8.84        |
| SPP1            | NM_001040058    | ref Homo sapiens secreted phosphoprotein 1 (SPP1), transcript variant 1, mRNA [NM_001040058]                                                                                                                                        | 8.54        |
| KLHL6           | NM_130446       | ref Homo sapiens kelch-like 6 (Drosophila) (KLHL6), mRNA [NM_130446]                                                                                                                                                                | 8.51        |
| OCA2            | NM_000275       | ref Homo sapiens oculocutaneous albinism II (OCA2), mRNA [NM_000275]                                                                                                                                                                | 8.43        |
| SIGLEC15        | NM_213602       | ref Homo sapiens sialic acid binding Ig-like lectin 15 (SIGLEC15), mRNA [NM_213602]                                                                                                                                                 | 8.41        |
| IGF1            | NM_000618       | ref Homo sapiens insulin-like growth factor 1 (somatomedin C) (IGF1), transcript variant 4, mRNA [NM_000618]                                                                                                                        | 8.38        |
| IGF1            | NM_000618       | ref Homo sapiens insulin-like growth factor 1 (somatomedin C) (IGF1), transcript variant 4, mRNA [NM_000618]                                                                                                                        | 8.35        |
| KLHL6           | NM_130446       | ref Homo sapiens kelch-like 6 (Drosophila) (KLHL6), mRNA [NM_130446]                                                                                                                                                                | 8.34        |
| SPP1            | NM_001040058    | ref Homo sapiens secreted phosphoprotein 1 (SPP1), transcript variant 1, mRNA [NM_001040058]                                                                                                                                        | 8.32        |
| THC2664989      | THC2664989      | thc Q40J89_EHRHC (Q40J89) Cation efflux protein, partial (6%) [THC2733597]                                                                                                                                                          | 8.32        |
| SPP1            | NM_001040058    | ref Homo sapiens secreted phosphoprotein 1 (SPP1), transcript variant 1, mRNA [NM_001040058]                                                                                                                                        | 8.26        |
| AK056882        | AK056882        | gb Homo sapiens cDNA FLJ32320 fis, clone PROST2003537. [AK056882]                                                                                                                                                                   | 8.25        |
| IGF1            | NM_000618       | ref Homo sapiens insulin-like growth factor 1 (somatomedin C) (IGF1), transcript variant 4, mRNA [NM_000618]                                                                                                                        | 8.21        |
| THC2559650      | THC2559650      | thc ALU5_HUMAN (P39192) Alu subfamily SC sequence contamination warning entry, partial (11%) [THC2559650]                                                                                                                           | 8.15        |
| SPP1            | NM_001040058    | ref Homo sapiens secreted phosphoprotein 1 (SPP1), transcript variant 1, mRNA [NM_001040058]                                                                                                                                        | 8.14        |
| SPP1            | NM_001040058    | ref Homo sapiens secreted phosphoprotein 1 (SPP1), transcript variant 1, mRNA [NM_001040058]                                                                                                                                        | 8.11        |
| NAT8            | NM_003960       | ref Homo sapiens N-acetyltransferase 8 (GCN5-related, putative) (NAT8), mRNA [NM_003960]                                                                                                                                            | 8.08        |
| SPP1            | NM_001040058    | ref Homo sapiens secreted phosphoprotein 1 (SPP1), transcript variant 1, mRNA [NM_001040058]                                                                                                                                        | 8.08        |
| IGF1            | NM_000618       | ref Homo sapiens insulin-like growth factor 1 (somatomedin C) (IGF1), transcript variant 4, mRNA [NM_000618]                                                                                                                        | 8.04        |
| HTN3            | NM_000200       | ref Homo sapiens histatin 3 (HTN3), mRNA [NM_000200]                                                                                                                                                                                | 8.03        |
| A_32_P112263    | A_32_P112263    | Unknown                                                                                                                                                                                                                             | 8.01        |
| ROPN1B          | NM_001012337    | ref Homo sapiens ropporin, rhophilin associated protein 1B (ROPN1B), mRNA [NM_001012337]                                                                                                                                            | 7.97        |
| SPP1            | NM_001040058    | ref Homo sapiens secreted phosphoprotein 1 (SPP1), transcript variant 1, mRNA [NM_001040058]                                                                                                                                        | 7.96        |
| RP4-692D3.1     | NM_001080850    | ref Homo sapiens hypothetical protein LOC728621 (LOC728621), mRNA [NM_001080850]                                                                                                                                                    | 7.93        |
| SPP1            | NM_001040058    | ref Homo sapiens secreted phosphoprotein 1 (SPP1), transcript variant 1, mRNA [NM_001040058]                                                                                                                                        | 7.92        |
| SCGB1D1         | NM_006552       | ref Homo sapiens secretoglobulin, family 1D, member 1 (SCGB1D1), mRNA [NM_006552]                                                                                                                                                   | 7.89        |
| TM4SF18         | NM_138786       | ref Homo sapiens transmembrane 4 L six family member 18 (TM4SF18), mRNA [NM_138786]                                                                                                                                                 | 7.88        |
| SPP1            | NM_001040058    | ref Homo sapiens secreted phosphoprotein 1 (SPP1), transcript variant 1, mRNA [NM_001040058]                                                                                                                                        | 7.85        |
| GML             | NM_002066       | ref Homo sapiens glycosylphosphatidylinositol anchored molecule like protein (GML), mRNA [NM_002066]                                                                                                                                | 7.83        |
| SPP1            | NM_001040058    | ref Homo sapiens secreted phosphoprotein 1 (SPP1), transcript variant 1, mRNA [NM_001040058]                                                                                                                                        | 7.83        |
| IGF1            | NM_000618       | ref Homo sapiens insulin-like growth factor 1 (somatomedin C) (IGF1), transcript variant 4, mRNA [NM_000618]                                                                                                                        | 7.83        |
| ZNF585A         | BC026081        | gb Homo sapiens zinc finger protein 585A, mRNA (cDNA clone IMAGE:4837344). [BC026081]                                                                                                                                               | 7.81        |
| DENND2D         | NM_024901       | ref Homo sapiens DENN/MADD domain containing 2D (DENND2D), mRNA [NM_024901]                                                                                                                                                         | 7.78        |
| BCAN            | NM_021948       | ref Homo sapiens brevicand (BCAN), transcript variant 1, mRNA [NM_021948]                                                                                                                                                           | 7.71        |
| TMPPRSS3        | NM_032405       | ref Homo sapiens transmembrane protease, serine 3 (TMPPRSS3), transcript variant D, mRNA [NM_032405]                                                                                                                                | 7.64        |
| TSPAN10         | NM_031945       | ref Homo sapiens tetraspanin 10 (TSPAN10), mRNA [NM_031945]                                                                                                                                                                         | 7.57        |
| DNAJA4          | NM_018602       | ref Homo sapiens DnaJ (Hsp40) homolog, subfamily A, member 4 (DNAJA4), transcript variant 1, mRNA [NM_018602]                                                                                                                       | 7.52        |
| IGF1            | NM_000618       | ref Homo sapiens insulin-like growth factor 1 (somatomedin C) (IGF1), transcript variant 4, mRNA [NM_000618]                                                                                                                        | 7.45        |
| ELSPBP1         | NM_022142       | ref Homo sapiens epididymal sperm binding protein 1 (ELSPBP1), mRNA [NM_022142]                                                                                                                                                     | 7.45        |
| CLDN14          | NM_144492       | ref Homo sapiens claudin 14 (CLDN14), transcript variant 1, mRNA [NM_144492]                                                                                                                                                        | 7.42        |
| C8orf75         | BC014230        | gb Homo sapiens cDNA clone IMAGE:4544942, partial cds. [BC014230]                                                                                                                                                                   | 7.27        |
| THC2711870      | THC2711870      | thc O60448_HUMAN (O60448) Neuronal thread protein AD7c-NTP, partial (5%) [THC2711870]                                                                                                                                               | 7.26        |
| IGF1            | NM_000618       | ref Homo sapiens insulin-like growth factor 1 (somatomedin C) (IGF1), transcript variant 4, mRNA [NM_000618]                                                                                                                        | 7.25        |
| SEMA6A          | NM_020796       | ref Homo sapiens sema domain, transmembrane domain (TM), and cytoplasmic domain, (semaphorin) 6A (SEMA6A), mRNA [NM_020796]                                                                                                         | 7.14        |
| ENST00000272035 | ENST00000272035 | ens Tubulin beta-8 chain [Source:UniProtKB/Swiss-Prot;Acc:Q3ZCM7] [ENST00000272035]                                                                                                                                                 | 7.11        |
| RLBP1           | NM_000326       | ref Homo sapiens retinaldehyde binding protein 1 (RLBP1), mRNA [NM_000326]                                                                                                                                                          | 6.99        |
| CRYM            | NM_001888       | ref Homo sapiens crystallin, mu (CRYM), transcript variant 1, mRNA [NM_001888]                                                                                                                                                      | 6.88        |
| KCNAB2          | NM_003636       | ref Homo sapiens potassium voltage-gated channel, shaker-related subfamily, beta member 2 (KCNAB2), transcript variant 1, mRNA [NM_003636]                                                                                          | 6.87        |
| CDH7            | NM_004361       | ref Homo sapiens cadherin 7, type 2 (CDH7), transcript variant 1, mRNA [NM_004361]                                                                                                                                                  | 6.86        |
| CAMK1G          | NM_020439       | ref Homo sapiens calcium/calmodulin-dependent protein kinase IG (CAMK1G), mRNA [NM_020439]                                                                                                                                          | 6.75        |
| RAB27A          | NM_004580       | ref Homo sapiens RAB27A, member RAS oncogene family (RAB27A), transcript variant 1, mRNA [NM_004580]                                                                                                                                | 6.72        |
| CHRDL2          | NM_015424       | ref Homo sapiens chordin-like 2 (CHRDL2), mRNA [NM_015424]                                                                                                                                                                          | 6.71        |
| FGFBP2          | NM_031950       | ref Homo sapiens fibroblast growth factor binding protein 2 (FGFBP2), mRNA [NM_031950]                                                                                                                                              | 6.70        |
| CEACAM1         | NM_001024912    | ref Homo sapiens carcinoembryonic antigen-related cell adhesion molecule 1 (biliary glycoprotein) (CEACAM1), transcript variant 2, mRNA [NM_001024912]                                                                              | 6.69        |
| CA14            | NM_012113       | ref Homo sapiens carbonic anhydrase XIV (CA14), mRNA [NM_012113]                                                                                                                                                                    | 6.64        |
| D4S234E         | NM_014392       | ref Homo sapiens DNA segment on chromosome 4 (unique) 234 expressed sequence (D4S234E), transcript variant 1, mRNA [NM_014392]                                                                                                      | 6.60        |
| PPY2            | NR_002181       | ref Homo sapiens pancreatic polypeptide 2 (PPY2), non-coding RNA [NR_002181]                                                                                                                                                        | 6.57        |
| BFSF2           | NM_003571       | ref Homo sapiens beaded filament structural protein 2, phakinin (BFSF2), mRNA [NM_003571]                                                                                                                                           | 6.57        |
| CAPN3           | NM_000070       | ref Homo sapiens calpain 3, (p94) (CAPN3), transcript variant 1, mRNA [NM_000070]                                                                                                                                                   | 6.56        |
| IGF1            | NM_000618       | ref Homo sapiens insulin-like growth factor 1 (somatomedin C) (IGF1), transcript variant 4, mRNA [NM_000618]                                                                                                                        | 6.55        |
| PLB1            | NM_153021       | ref Homo sapiens phospholipase B1 (PLB1), mRNA [NM_153021]                                                                                                                                                                          | 6.53        |
| SPACA3          | NM_173847       | ref Homo sapiens sperm acrosome associated 3 (SPACA3), mRNA [NM_173847]                                                                                                                                                             | 6.49        |

|                 |                 |                                                                                                                                                              |      |
|-----------------|-----------------|--------------------------------------------------------------------------------------------------------------------------------------------------------------|------|
| C21orf129       | AK057397        | gb Homo sapiens cDNA FLJ32835 fis, clone TESTI2003255. [AK057397]                                                                                            | 6.47 |
| RP13-401N8.2    | AL096727        | gb Homo sapiens mRNA; cDNA DKFZp434B104 (from clone DKFZp434B104). [AL096727]                                                                                | 6.46 |
| ST6GALNAC2      | NM_006456       | ref Homo sapiens ST6 (alpha-N-acetylneuraminyl-2,3-beta-galactosyl-1.3)-N-acetylgalactosaminide alpha-2,6-sialyltransferase 2 (ST6GALNAC2), mRNA [NM_006456] | 6.42 |
| PLP1            | BC002665        | ref Homo sapiens proteolipid protein 1, mRNA (cDNA clone MGC:3940 IMAGE:306269), complete cds. [BC002665]                                                    | 6.39 |
| FGFBP2          | NM_031950       | ref Homo sapiens fibroblast growth factor binding protein 2 (FGFBP2), mRNA [NM_031950]                                                                       | 6.34 |
| PRDM9           | NM_020227       | ref Homo sapiens PR domain containing 9 (PRDM9), mRNA [NM_020227]                                                                                            | 6.32 |
| PDE4DIP         | NM_014644       | ref Homo sapiens phosphodiesterase 4D interacting protein (PDE4DIP), transcript variant 1, mRNA [NM_014644]                                                  | 6.29 |
| BC014938        | BC014938        | gb Homo sapiens, clone IMAGE:3922198, mRNA. [BC014938]                                                                                                       | 6.23 |
| C1orf54         | NM_024579       | ref Homo sapiens chromosome 1 open reading frame 54 (C1orf54), mRNA [NM_024579]                                                                              | 6.15 |
| CARD14          | NM_024110       | ref Homo sapiens caspase recruitment domain family, member 14 (CARD14), transcript variant 1, mRNA [NM_024110]                                               | 6.15 |
| LUZP4           | NM_016383       | ref Homo sapiens leucine zipper protein 4 (LUZP4), mRNA [NM_016383]                                                                                          | 6.12 |
| DEXI            | AK055529        | gb Homo sapiens cDNA FLJ30967 fis, clone HEART2000309, weakly similar to PTB-ASSOCIATED SPLICING FACTOR. [AK055529]                                          | 6.02 |
| DSP             | NM_004415       | ref Homo sapiens desmoplakin (DSP), transcript variant 1, mRNA [NM_004415]                                                                                   | 6.00 |
| SCGB1D2         | NM_006551       | ref Homo sapiens secretoglobin, family 1D, member 2 (SCGB1D2), mRNA [NM_006551]                                                                              | 5.92 |
| ITGA7           | NM_002206       | ref Homo sapiens integrin, alpha 7 (ITGA7), mRNA [NM_002206]                                                                                                 | 5.92 |
| BIRC7           | NM_022161       | ref Homo sapiens baculoviral IAP repeat-containing 7 (BIRC7), transcript variant 2, mRNA [NM_022161]                                                         | 5.85 |
| DYNC111         | NM_004411       | ref Homo sapiens dynein, cytoplasmic 1, intermediate chain 1 (DYNC111), transcript variant 1, mRNA [NM_004411]                                               | 5.76 |
| MGP             | NM_000900       | ref Homo sapiens matrix Gla protein (MGP), mRNA [NM_000900]                                                                                                  | 5.67 |
| MYLK            | NM_053025       | ref Homo sapiens myosin light chain kinase (MYLK), transcript variant 1, mRNA [NM_053025]                                                                    | 5.67 |
| MLL110          | BC032532        | gb Homo sapiens myeloid/lymphoid or mixed-lineage leukemia (trithorax homolog, Drosophila); translocated to, 10, mRNA (cDNA clone IMAGE:5526778), with a     | 5.66 |
| THC2689164      | THC2689164      | Unknown                                                                                                                                                      | 5.65 |
| HGB1            | NM_000559       | ref Homo sapiens hemoglobin, gamma A (HGB1), mRNA [NM_000559]                                                                                                | 5.65 |
| SEMA6A          | NM_020796       | ref Homo sapiens sema domain, transmembrane domain (TM), and cytoplasmic domain, (semaphorin) 6A (SEMA6A), mRNA [NM_020796]                                  | 5.63 |
| VGF             | NM_003378       | ref Homo sapiens VGF nerve growth factor inducible (VGF), mRNA [NM_003378]                                                                                   | 5.58 |
| LOC645591       | BC012751        | gb Homo sapiens cDNA clone IMAGE:3621376, partial cds. [BC012751]                                                                                            | 5.56 |
| HAS2            | NM_005328       | ref Homo sapiens hyaluronan synthase 2 (HAS2), mRNA [NM_005328]                                                                                              | 5.52 |
| TRIM63          | NM_032588       | ref Homo sapiens tripartite motif-containing 63 (TRIM63), mRNA [NM_032588]                                                                                   | 5.52 |
| SULT1C2         | NM_176825       | ref Homo sapiens sulfotransferase family, cytosolic, 1C, member 2 (SULT1C2), transcript variant 2, mRNA [NM_176825]                                          | 5.46 |
| LRAT            | NM_004744       | ref Homo sapiens lecithin retinol acyltransferase (phosphatidylcholine-retinol O-acyltransferase) (LRAT), mRNA [NM_004744]                                   | 5.46 |
| BHLHE41         | NM_030762       | ref Homo sapiens basic helix-loop-helix domain containing, class B, 3 (BHLHE41), mRNA [NM_030762]                                                            | 5.40 |
| THC2733597      | THC2733597      | thc Q40J89_EHRCH (Q40J89) Cation efflux protein, partial (6%) [THC2733597]                                                                                   | 5.33 |
| THC2701341      | THC2701341      | thc DQ071571 spermatin (Rattus norvegicus) (exp=-1; wgp=0; cg=0), partial (19%) [THC2701341]                                                                 | 5.28 |
| SEMA6A          | NM_020796       | ref Homo sapiens sema domain, transmembrane domain (TM), and cytoplasmic domain, (semaphorin) 6A (SEMA6A), mRNA [NM_020796]                                  | 5.27 |
| SGCD            | NM_000337       | ref Homo sapiens sarcoglycan, delta (35kDa dystrophin-associated glycoprotein) (SGCD), transcript variant 1, mRNA [NM_000337]                                | 5.25 |
| hCG_2019139     | AK056971        | gb Homo sapiens cDNA FLJ32409 fis, clone SKMUM2000468, [AK056971]                                                                                            | 5.23 |
| AF339787        | AF339787        | gb Homo sapiens clone IMAGE:205688, mRNA sequence. [AF339787]                                                                                                | 5.18 |
| CBX5            | NM_001127322    | ref Homo sapiens chromobox homolog 5 (HP1 alpha homolog, Drosophila) (CBX5), transcript variant 1, mRNA [NM_001127322]                                       | 5.18 |
| ST3GAL4         | NM_006278       | ref Homo sapiens ST3 beta-galactoside alpha-2,3-sialyltransferase 4 (ST3GAL4), mRNA [NM_006278]                                                              | 5.17 |
| BCAN            | NM_198427       | ref Homo sapiens brevican (BCAN), transcript variant 2, mRNA [NM_198427]                                                                                     | 5.13 |
| CTSZ            | NM_001336       | ref Homo sapiens cathepsin Z (CTSZ), mRNA [NM_001336]                                                                                                        | 5.12 |
| MITF            | NM_198159       | ref Homo sapiens microphthalmia-associated transcription factor (MITF), transcript variant 1, mRNA [NM_198159]                                               | 5.11 |
| ATOH8           | NM_032827       | ref Homo sapiens atonal homolog 8 (Drosophila) (ATOH8), mRNA [NM_032827]                                                                                     | 5.08 |
| MITF            | NM_198159       | ref Homo sapiens microphthalmia-associated transcription factor (MITF), transcript variant 1, mRNA [NM_198159]                                               | 5.07 |
| GALNT3          | NM_004482       | ref Homo sapiens UDP-N-acetyl-alpha-D-galactosamine:polyprotein N-acetylgalactosaminyltransferase 3 (GalNAc-T3) (GALNT3), mRNA [NM_004482]                   | 5.01 |
| CDK2            | NM_001798       | ref Homo sapiens cyclin-dependent kinase 2 (CDK2), transcript variant 1, mRNA [NM_001798]                                                                    | 4.98 |
| TYRP1           | NM_000550       | ref Homo sapiens tyrosinase-related protein 1 (TYRP1), mRNA [NM_000550]                                                                                      | 4.98 |
| LOC286382       | AK094356        | gb Homo sapiens cDNA FLJ37037 fis, clone BRACE2011611. [AK094356]                                                                                            | 4.97 |
| DYNC111         | NM_004411       | ref Homo sapiens dynein, cytoplasmic 1, intermediate chain 1 (DYNC111), transcript variant 1, mRNA [NM_004411]                                               | 4.96 |
| PMP2            | NM_002677       | ref Homo sapiens peripheral myelin protein 2 (PMP2), mRNA [NM_002677]                                                                                        | 4.89 |
| BACE2           | NM_012105       | ref Homo sapiens beta-site APP-cleaving enzyme 2 (BACE2), transcript variant a, mRNA [NM_012105]                                                             | 4.87 |
| SOX10           | NM_006941       | ref Homo sapiens SRY (sex determining region Y)-box 10 (SOX10), mRNA [NM_006941]                                                                             | 4.85 |
| SOX10           | NM_006941       | ref Homo sapiens SRY (sex determining region Y)-box 10 (SOX10), mRNA [NM_006941]                                                                             | 4.85 |
| CDK2            | NM_001798       | ref Homo sapiens cyclin-dependent kinase 2 (CDK2), transcript variant 1, mRNA [NM_001798]                                                                    | 4.83 |
| CDK2            | NM_001798       | ref Homo sapiens cyclin-dependent kinase 2 (CDK2), transcript variant 1, mRNA [NM_001798]                                                                    | 4.82 |
| MYLK            | NM_053025       | ref Homo sapiens myosin light chain kinase (MYLK), transcript variant 1, mRNA [NM_053025]                                                                    | 4.82 |
| PHF15           | NM_015288       | ref Homo sapiens PHD finger protein 15 (PHF15), mRNA [NM_015288]                                                                                             | 4.81 |
| GPR161          | NM_153832       | ref Homo sapiens G protein-coupled receptor 161 (GPR161), transcript variant 2, mRNA [NM_153832]                                                             | 4.81 |
| PHF15           | NM_015288       | ref Homo sapiens PHD finger protein 15 (PHF15), mRNA [NM_015288]                                                                                             | 4.80 |
| C16orf89        | NM_152459       | ref Homo sapiens chromosome 16 open reading frame 89 (C16orf89), transcript variant 1, mRNA [NM_152459]                                                      | 4.80 |
| SIRPB1          | NM_006065       | ref Homo sapiens signal-regulatory protein beta 1 (SIRPB1), transcript variant 1, mRNA [NM_006065]                                                           | 4.79 |
| BACE2           | NM_012105       | ref Homo sapiens beta-site APP-cleaving enzyme 2 (BACE2), transcript variant a, mRNA [NM_012105]                                                             | 4.78 |
| SIRPA           | NM_001040022    | ref Homo sapiens signal-regulatory protein alpha (SIRPA), transcript variant 1, mRNA [NM_001040022]                                                          | 4.78 |
| KCNAB1          | NM_003471       | ref Homo sapiens potassium voltage-gated channel, shaker-related subfamily, beta member 1 (KCNAB1), transcript variant 2, mRNA [NM_003471]                   | 4.78 |
| CDK2            | NM_001798       | ref Homo sapiens cyclin-dependent kinase 2 (CDK2), transcript variant 1, mRNA [NM_001798]                                                                    | 4.76 |
| PKD1L2          | NM_052892       | ref Homo sapiens polycystic kidney disease 1-like 2 (PKD1L2), transcript variant 1, mRNA [NM_052892]                                                         | 4.75 |
| HGB1            | NM_000559       | ref Homo sapiens hemoglobin, gamma A (HGB1), mRNA [NM_000559]                                                                                                | 4.75 |
| CDK2            | NM_001798       | ref Homo sapiens cyclin-dependent kinase 2 (CDK2), transcript variant 1, mRNA [NM_001798]                                                                    | 4.75 |
| KCNAB2          | NM_003636       | ref Homo sapiens potassium voltage-gated channel, shaker-related subfamily, beta member 2 (KCNAB2), transcript variant 1, mRNA [NM_003636]                   | 4.72 |
| PPP1CB          | NM_002709       | ref Homo sapiens protein phosphatase 1, catalytic subunit, beta isoform (PPP1CB), transcript variant 1, mRNA [NM_002709]                                     | 4.72 |
| C6orf218        | NM_152738       | ref Homo sapiens chromosome 6 open reading frame 218 (C6orf218), mRNA [NM_152738]                                                                            | 4.70 |
| ENST00000327299 | ENST00000327299 | ens Adenylate kinase isoenzyme 4, mitochondrial (EC 2.7.4.3)(Adenylate kinase 3-like)(ATP-AMP transphosphorylase) [Source:UniProtKB/Swiss-Prot;Acc:P271]     | 4.70 |
| GHR             | NM_000163       | ref Homo sapiens growth hormone receptor (GHR), mRNA [NM_000163]                                                                                             | 4.68 |
| PPARGC1A        | NM_013261       | ref Homo sapiens peroxisome proliferator-activated receptor gamma, coactivator 1 alpha (PPARGC1A), mRNA [NM_013261]                                          | 4.67 |
| HGB1            | NM_000559       | ref Homo sapiens hemoglobin, gamma A (HGB1), mRNA [NM_000559]                                                                                                | 4.67 |
| SLIT1           | NM_003061       | ref Homo sapiens slit homolog 1 (Drosophila) (SLIT1), mRNA [NM_003061]                                                                                       | 4.66 |
| PTCRA           | NM_138296       | ref Homo sapiens pre T-cell antigen receptor alpha (PTCRA), mRNA [NM_138296]                                                                                 | 4.64 |
| MOBKLB2         | NM_024761       | ref Homo sapiens Mps One Binder kinase activator-like 2B (yeast) (MOBKLB2), mRNA [NM_024761]                                                                 | 4.62 |
| CDK2            | NM_001798       | ref Homo sapiens cyclin-dependent kinase 2 (CDK2), transcript variant 1, mRNA [NM_001798]                                                                    | 4.61 |
| MLPH            | NM_024101       | ref Homo sapiens melanophilin (MLPH), transcript variant 1, mRNA [NM_024101]                                                                                 | 4.61 |
| GJB1            | NM_000166       | ref Homo sapiens gap junction protein, beta 1, 32kDa (GJB1), transcript variant 2, mRNA [NM_000166]                                                          | 4.60 |
| MCAM            | NM_006500       | ref Homo sapiens melanoma cell adhesion molecule (MCAM), mRNA [NM_006500]                                                                                    | 4.59 |
| CDK2            | NM_001798       | ref Homo sapiens cyclin-dependent kinase 2 (CDK2), transcript variant 1, mRNA [NM_001798]                                                                    | 4.59 |
| LEPREL1         | NM_018192       | ref Homo sapiens leprecan-like 1 (LEPREL1), transcript variant 1, mRNA [NM_018192]                                                                           | 4.59 |
| MITF            | NM_198159       | ref Homo sapiens microphthalmia-associated transcription factor (MITF), transcript variant 1, mRNA [NM_198159]                                               | 4.58 |
| ENO2            | NM_001975       | ref Homo sapiens enolase 2 (gamma, neuronal) (ENO2), mRNA [NM_001975]                                                                                        | 4.58 |
| DHRS2           | NM_182908       | ref Homo sapiens dehydrogenase/reductase (SDR family) member 2 (DHRS2), transcript variant 1, mRNA [NM_182908]                                               | 4.58 |
| HGB1            | NM_000559       | ref Homo sapiens hemoglobin, gamma A (HGB1), mRNA [NM_000559]                                                                                                | 4.57 |
| CDK2            | NM_001798       | ref Homo sapiens cyclin-dependent kinase 2 (CDK2), transcript variant 1, mRNA [NM_001798]                                                                    | 4.55 |
| CV800149        | CV800149        | gb AAGENCOURT_37001201 NIH_MGC_280 Homo sapiens cDNA clone IMAGE:7505458 5', mRNA sequence [CV800149]                                                        | 4.49 |
| SPRR3           | NM_005416       | ref Homo sapiens small proline-rich protein 3 (SPRR3), transcript variant 1, mRNA [NM_005416]                                                                | 4.48 |
| ITK             | NM_005546       | ref Homo sapiens IL2-inducible T-cell kinase (ITK), mRNA [NM_005546]                                                                                         | 4.48 |
| KIAA0746        | NM_015187       | ref Homo sapiens KIAA0746 protein (KIAA0746), mRNA [NM_015187]                                                                                               | 4.48 |
| THC2520542      | THC2520542      | thc Q9XDH2_MYCTU (Q9XDH2) Proline-rich mucin homolog, partial (3%) [THC2520542]                                                                              | 4.48 |
| ATP10A          | NM_024490       | ref Homo sapiens ATPase, class V, type 10A (ATP10A), mRNA [NM_024490]                                                                                        | 4.46 |
| ST3GAL4         | AK021929        | gb Homo sapiens cDNA FLJ11867 fis, clone HEMBA1006976, weakly similar to H.sapiens mRNA for Gal-beta(1-3/1-4)GlcNAc alpha-2,3-sialyltransferase. [AK021929]  | 4.45 |
| HGB1            | NM_000559       | ref Homo sapiens hemoglobin, gamma A (HGB1), mRNA [NM_000559]                                                                                                | 4.44 |
| GJB1            | NM_000166       | ref Homo sapiens gap junction protein, beta 1, 32kDa (GJB1), transcript variant 2, mRNA [NM_000166]                                                          | 4.44 |
| MYH10           | NM_005964       | ref Homo sapiens myosin, heavy chain 10, non-muscle (MYH10), mRNA [NM_005964]                                                                                | 4.43 |
| DUSP23          | NM_017823       | ref Homo sapiens dual specificity phosphatase 23 (DUSP23), mRNA [NM_017823]                                                                                  | 4.43 |
| CDK2            | NM_001798       | ref Homo sapiens cyclin-dependent kinase 2 (CDK2), transcript variant 1, mRNA [NM_001798]                                                                    | 4.43 |
| PKIA            | NM_006823       | ref Homo sapiens protein kinase (cAMP-dependent, catalytic) inhibitor alpha (PKIA), transcript variant 6, mRNA [NM_006823]                                   | 4.40 |
| RGN             | NM_152869       | ref Homo sapiens regucalcin (senescence marker protein-30) (RGN), transcript variant 2, mRNA [NM_152869]                                                     | 4.40 |
| CCL17           | NM_002987       | ref Homo sapiens chemokine (C-C motif) ligand 17 (CCL17), mRNA [NM_002987]                                                                                   | 4.38 |
| OPHN1           | NM_002547       | ref Homo sapiens oligophrenin 1 (OPHN1), mRNA [NM_002547]                                                                                                    | 4.38 |
| FAM174B         | NM_207446       | ref Homo sapiens family with sequence similarity 174, member B (FAM174B), mRNA [NM_207446]                                                                   | 4.37 |
| FSTL5           | NM_020116       | ref Homo sapiens follistatin-like 5 (FSTL5), transcript variant 1, mRNA [NM_020116]                                                                          | 4.34 |
| MCAM            | NM_006500       | ref Homo sapiens melanoma cell adhesion molecule (MCAM), mRNA [NM_006500]                                                                                    | 4.34 |
| HGB1            | NM_000559       | ref Homo sapiens hemoglobin, gamma A (HGB1), mRNA [NM_000559]                                                                                                | 4.32 |
| DHRS2           | NM_182908       | ref Homo sapiens dehydrogenase/reductase (SDR family) member 2 (DHRS2), transcript variant 1, mRNA [NM_182908]                                               | 4.32 |
| ST6GALNAC1      | NM_018414       | ref Homo sapiens ST6 (alpha-N-acetylneuraminyl-2,3-beta-galactosyl-1.3)-N-acetylgalactosaminide alpha-2,6-sialyltransferase 1 (ST6GALNAC1), mRNA [NM_018414] | 4.29 |
| NAT8B           | NM_016347       | ref Homo sapiens N-acetyltransferase 8B (GCN5-related, putative, gene/pseudogene) (NAT8B), mRNA [NM_016347]                                                  | 4.26 |

|                 |                 |                                                                                                                                                                                                           |      |
|-----------------|-----------------|-----------------------------------------------------------------------------------------------------------------------------------------------------------------------------------------------------------|------|
| PMP2            | NM_002677       | ref Homo sapiens peripheral myelin protein 2 (PMP2), mRNA [NM_002677]                                                                                                                                     | 4,26 |
| HGB1            | NM_000559       | ref Homo sapiens hemoglobin, gamma A (HGB1), mRNA [NM_000559]                                                                                                                                             | 4,25 |
| GAGE3           | U19144          | gb Human GAGE-3 protein mRNA, complete cds. [U19144]                                                                                                                                                      | 4,25 |
| LDB3            | NM_007078       | ref Homo sapiens LIM domain binding 3 (LDB3), transcript variant 1, mRNA [NM_007078]                                                                                                                      | 4,24 |
| CDK2            | NM_001798       | ref Homo sapiens cyclin-dependent kinase 2 (CDK2), transcript variant 1, mRNA [NM_001798]                                                                                                                 | 4,24 |
| FCRLA           | NM_032738       | ref Homo sapiens Fc receptor-like A (FCRLA), mRNA [NM_032738]                                                                                                                                             | 4,24 |
| BST2            | NM_004335       | ref Homo sapiens bone marrow stromal cell antigen 2 (BST2), mRNA [NM_004335]                                                                                                                              | 4,22 |
| AP1S2           | NM_003916       | ref Homo sapiens adaptor-related protein complex 1, sigma 2 subunit (AP1S2), mRNA [NM_003916]                                                                                                             | 4,22 |
| SILV            | NM_006928       | ref Homo sapiens silver homolog (mouse) (SILV), mRNA [NM_006928]                                                                                                                                          | 4,21 |
| SIRPA           | NM_001040022    | ref Homo sapiens signal-regulatory protein alpha (SIRPA), transcript variant 1, mRNA [NM_001040022]                                                                                                       | 4,19 |
| MLPH            | NM_001042467    | ref Homo sapiens melanophilin (MLPH), transcript variant 2, mRNA [NM_001042467]                                                                                                                           | 4,19 |
| CR749704        | CR749704        | gb Homo sapiens mRNA: cDNA DKFZp434D1072 (from clone DKFZp434D1072). [CR749704]                                                                                                                           | 4,17 |
| BC063881        | BC063881        | gb Homo sapiens cDNA clone IMAGE:30390303, with apparent retained intron. [BC063881]                                                                                                                      | 4,14 |
| SLC45A2         | NM_016180       | ref Homo sapiens solute carrier family 45, member 2 (SLC45A2), transcript variant 1, mRNA [NM_016180]                                                                                                     | 4,12 |
| HGB1            | NM_000559       | ref Homo sapiens hemoglobin, gamma A (HGB1), mRNA [NM_000559]                                                                                                                                             | 4,11 |
| DMKN            | NM_001035516    | ref Homo sapiens dermokine (DMKN), transcript variant 1, mRNA [NM_001035516]                                                                                                                              | 4,10 |
| STK32A          | NM_145001       | ref Homo sapiens serine/threonine kinase 32A (STK32A), transcript variant 2, mRNA [NM_145001]                                                                                                             | 4,09 |
| FAM167B         | NM_032648       | ref Homo sapiens family with sequence similarity 167, member B (FAM167B), mRNA [NM_032648]                                                                                                                | 4,08 |
| AK024680        | AK024680        | gb Homo sapiens cDNA: FLJ21027 fis, clone CAE07110. [AK024680]                                                                                                                                            | 4,05 |
| MOBK12B         | NM_024761       | ref Homo sapiens MOB1, Mps One Binder kinase activator-like 2B (yeast) (MOBK12B), mRNA [NM_024761]                                                                                                        | 4,04 |
| URO8            | CR601670        | gb full-length cDNA clone CS0DL001YD09 of B cells (Ramos cell line) Cot 25-normalized of Homo sapiens (human). [CR601670]                                                                                 | 4,04 |
| VEGFB           | NM_003377       | ref Homo sapiens vascular endothelial growth factor B (VEGFB), mRNA [NM_003377]                                                                                                                           | 4,04 |
| TTC39A          | NM_001080494    | ref Homo sapiens tetrapeptide repeat domain 39A (TTC39A), mRNA [NM_001080494]                                                                                                                             | 4,03 |
| HGB1            | NM_000559       | ref Homo sapiens hemoglobin, gamma A (HGB1), mRNA [NM_000559]                                                                                                                                             | 4,02 |
| CEACAM3         | NM_001815       | ref Homo sapiens carcinoembryonic antigen-related cell adhesion molecule 3 (CEACAM3), mRNA [NM_001815]                                                                                                    | 4,01 |
| HGB1            | NM_000559       | ref Homo sapiens hemoglobin, gamma A (HGB1), mRNA [NM_000559]                                                                                                                                             | 4,00 |
| GPR161          | NM_153832       | ref Homo sapiens G protein-coupled receptor 161 (GPR161), transcript variant 2, mRNA [NM_153832]                                                                                                          | 4,00 |
| ITM2A           | NM_004867       | ref Homo sapiens integral membrane protein 2A (ITM2A), mRNA [NM_004867]                                                                                                                                   | 4,00 |
| LRAT            | NM_004744       | ref Homo sapiens lecithin retinol acyltransferase (phosphatidylcholine--retinol O-acyltransferase) (LRAT), mRNA [NM_004744]                                                                               | 3,99 |
| MLPH            | NM_024101       | ref Homo sapiens melanophilin (MLPH), transcript variant 1, mRNA [NM_024101]                                                                                                                              | 3,98 |
| FUT5            | NM_002034       | ref Homo sapiens fucosyltransferase 5 (alpha (1,3) fucosyltransferase) (FUT5), mRNA [NM_002034]                                                                                                           | 3,97 |
| GPR56           | NM_201525       | ref Homo sapiens G protein-coupled receptor 56 (GPR56), transcript variant 3, mRNA [NM_201525]                                                                                                            | 3,96 |
| PPM1H           | NM_020700       | ref Homo sapiens protein phosphatase 1H (PP2C domain containing) (PPM1H), mRNA [NM_020700]                                                                                                                | 3,95 |
| HGB1            | NM_000559       | ref Homo sapiens hemoglobin, gamma A (HGB1), mRNA [NM_000559]                                                                                                                                             | 3,94 |
| ME3             | NM_001014811    | ref Homo sapiens malic enzyme 3, NAD(P)+-dependent, mitochondrial (ME3), nuclear gene encoding mitochondrial protein, transcript variant 2, mRNA [NM_001014811]                                           | 3,93 |
| GPR161          | NM_153832       | ref Homo sapiens G protein-coupled receptor 161 (GPR161), transcript variant 2, mRNA [NM_153832]                                                                                                          | 3,92 |
| E2F1            | NM_005225       | ref Homo sapiens E2F transcription factor 1 (E2F1), mRNA [NM_005225]                                                                                                                                      | 3,92 |
| ENST00000327299 | ENST00000327299 | ens Adenylate kinase isoenzyme 4, mitochondrial (EC 2.7.4.3)(Adenylate kinase 3-like)(ATP-AMP transphosphorylase) [Source:UniProtKB/Swiss-Prot;Acc:P271-gb]Sequence 153 from Patent WO0220754. [AX721193] | 3,91 |
| AX721193        | AX721193        | gb Sequence 153 from Patent WO0220754. [AX721193]                                                                                                                                                         | 3,91 |
| MDGA1           | NM_153487       | ref Homo sapiens MAM domain containing glycosylphosphatidylinositol anchor 1 (MDGA1), mRNA [NM_153487]                                                                                                    | 3,91 |
| SMPD1           | NM_000543       | ref Homo sapiens sphingomyelin phosphodiesterase 1, acid lysosomal (SMPD1), transcript variant 1, mRNA [NM_000543]                                                                                        | 3,89 |
| E2F1            | NM_005225       | ref Homo sapiens E2F transcription factor 1 (E2F1), mRNA [NM_005225]                                                                                                                                      | 3,89 |
| ANXA13          | NM_001003954    | ref Homo sapiens annexin A13 (ANXA13), transcript variant 2, mRNA [NM_001003954]                                                                                                                          | 3,88 |
| B1013473        | B1013473        | gb RC0-ET0185-220101-021-h02 ET0185 Homo sapiens cDNA, mRNA sequence [B1013473]                                                                                                                           | 3,88 |
| E2F1            | NM_005225       | ref Homo sapiens E2F transcription factor 1 (E2F1), mRNA [NM_005225]                                                                                                                                      | 3,87 |
| BC061638        | BC061638        | gb Homo sapiens cDNA clone IMAGE:5547707, partial cds. [BC061638]                                                                                                                                         | 3,86 |
| E2F1            | NM_005225       | ref Homo sapiens E2F transcription factor 1 (E2F1), mRNA [NM_005225]                                                                                                                                      | 3,86 |
| STXBP6          | NM_014178       | ref Homo sapiens syntaxin binding protein 6 (amisyn) (STXBP6), mRNA [NM_014178]                                                                                                                           | 3,85 |
| LRGUK           | NM_144648       | ref Homo sapiens leucine-rich repeats and guanylate kinase domain containing (LRGUK), mRNA [NM_144648]                                                                                                    | 3,85 |
| GAGE7           | NM_021123       | ref Homo sapiens antigen 7 (GAGE7), mRNA [NM_021123]                                                                                                                                                      | 3,84 |
| MORC1           | NM_014429       | ref Homo sapiens MORC family CW-type zinc finger 1 (MORC1), mRNA [NM_014429]                                                                                                                              | 3,84 |
| PTPRJ           | NM_002843       | ref Homo sapiens protein tyrosine phosphatase, receptor type, J (PTPRJ), transcript variant 1, mRNA [NM_002843]                                                                                           | 3,84 |
| E2F1            | NM_005225       | ref Homo sapiens E2F transcription factor 1 (E2F1), mRNA [NM_005225]                                                                                                                                      | 3,83 |
| FYB             | NM_001465       | ref Homo sapiens FYN binding protein (FYB-120/130) (FYB), transcript variant 1, mRNA [NM_001465]                                                                                                          | 3,83 |
| AK090694        | AK090694        | gb Homo sapiens cDNA FLJ33375 fis, clone BRACE2006137. [AK090694]                                                                                                                                         | 3,83 |
| E2F1            | NM_005225       | ref Homo sapiens E2F transcription factor 1 (E2F1), mRNA [NM_005225]                                                                                                                                      | 3,83 |
| CBLN1           | NM_004352       | ref Homo sapiens cerebellin 1 precursor (CBLN1), mRNA [NM_004352]                                                                                                                                         | 3,82 |
| GHR             | NM_000163       | ref Homo sapiens growth hormone receptor (GHR), mRNA [NM_000163]                                                                                                                                          | 3,82 |
| SCARB1          | NM_005505       | ref Homo sapiens scavenger receptor class B, member 1 (SCARB1), transcript variant 1, mRNA [NM_005505]                                                                                                    | 3,81 |
| PRDM9           | NM_020227       | ref Homo sapiens PR domain containing 9 (PRDM9), mRNA [NM_020227]                                                                                                                                         | 3,79 |
| HLA-DMB         | NM_002118       | ref Homo sapiens major histocompatibility complex, class II, DM beta (HLA-DMB), mRNA [NM_002118]                                                                                                          | 3,79 |
| DHRS3           | NM_004753       | ref Homo sapiens dehydrogenase/reductase (SDR family) member 3 (DHRS3), mRNA [NM_004753]                                                                                                                  | 3,77 |
| PKD1L2          | NM_052892       | ref Homo sapiens polycystic kidney disease 1-like 2 (PKD1L2), transcript variant 1, mRNA [NM_052892]                                                                                                      | 3,77 |
| SNAI2           | NM_003068       | ref Homo sapiens snail homolog 2 (Drosophila) (SNAI2), mRNA [NM_003068]                                                                                                                                   | 3,76 |
| E2F1            | NM_005225       | ref Homo sapiens E2F transcription factor 1 (E2F1), mRNA [NM_005225]                                                                                                                                      | 3,76 |
| E2F1            | NM_005225       | ref Homo sapiens E2F transcription factor 1 (E2F1), mRNA [NM_005225]                                                                                                                                      | 3,76 |
| ITGB8           | NM_002214       | ref Homo sapiens integrin, beta 8 (ITGB8), mRNA [NM_002214]                                                                                                                                               | 3,75 |
| EDEM1           | NM_014674       | ref Homo sapiens ER degradation enhancer, mannosidase alpha-like 1 (EDEM1), mRNA [NM_014674]                                                                                                              | 3,75 |
| RGS20           | NM_170587       | ref Homo sapiens regulator of G-protein signaling 20 (RGS20), transcript variant 1, mRNA [NM_170587]                                                                                                      | 3,73 |
| CABLES1         | NM_136375       | ref Homo sapiens Cdk5 and Abl enzyme substrate 1 (CABLES1), transcript variant 1, mRNA [NM_136375]                                                                                                        | 3,73 |
| IRF4            | NM_002460       | ref Homo sapiens interferon regulatory factor 4 (IRF4), mRNA [NM_002460]                                                                                                                                  | 3,72 |
| E2F1            | NM_005225       | ref Homo sapiens E2F transcription factor 1 (E2F1), mRNA [NM_005225]                                                                                                                                      | 3,71 |
| E2F1            | NM_005225       | ref Homo sapiens E2F transcription factor 1 (E2F1), mRNA [NM_005225]                                                                                                                                      | 3,71 |
| EPHX1           | NM_000120       | ref Homo sapiens epoxide hydrolase 1, microsomal (xenobiotic) (EPHX1), transcript variant 1, mRNA [NM_000120]                                                                                             | 3,71 |
| GPR56           | NM_201525       | ref Homo sapiens G protein-coupled receptor 56 (GPR56), transcript variant 3, mRNA [NM_201525]                                                                                                            | 3,69 |
| LYPD1           | NM_144586       | ref Homo sapiens LY6/PLAUR domain containing 1 (LYPD1), transcript variant 1, mRNA [NM_144586]                                                                                                            | 3,69 |
| FAM152A         | BC020640        | gb Homo sapiens family with sequence similarity 152, member A, mRNA (cDNA clone IMAGE:4718788), partial cds. [BC020640]                                                                                   | 3,69 |
| KRT23           | NM_015515       | ref Homo sapiens keratin 23 (histone deacetylase inducible) (KRT23), mRNA [NM_015515]                                                                                                                     | 3,68 |
| PTTG1IP         | NM_004339       | ref Homo sapiens pituitary tumor-transforming 1 interacting protein (PTTG1IP), mRNA [NM_004339]                                                                                                           | 3,68 |
| X83127          | X83127          | gb H. sapiens mRNA for voltage gated potassium channels, beta subunit. [X83127]                                                                                                                           | 3,68 |
| PLXNC1          | AB208934        | gb Homo sapiens mRNA for plexin C1 variant protein. [AB208934]                                                                                                                                            | 3,68 |
| TMPRSS5         | NM_030770       | ref Homo sapiens transmembrane protease, serine 5 (TMPRSS5), mRNA [NM_030770]                                                                                                                             | 3,68 |
| SMOC2           | NM_022138       | ref Homo sapiens SPARC related modular calcium binding 2 (SMOC2), mRNA [NM_022138]                                                                                                                        | 3,67 |
| NRP2            | NM_201266       | ref Homo sapiens neuropilin 2 (NRP2), transcript variant 1, mRNA [NM_201266]                                                                                                                              | 3,67 |
| BG682198        | BG682198        | gb 60262950F1 NCI_CGAP_Skn4 Homo sapiens cDNA clone IMAGE:4754377 5', mRNA sequence [BG682198]                                                                                                            | 3,67 |
| SFTPC           | NM_003018       | ref Homo sapiens surfactant protein C (SFTPC), mRNA [NM_003018]                                                                                                                                           | 3,67 |
| C15orf39        | NM_015492       | ref Homo sapiens chromosome 15 open reading frame 39 (C15orf39), mRNA [NM_015492]                                                                                                                         | 3,66 |
| AFAP1L1         | NM_152406       | ref Homo sapiens actin filament associated protein 1-like 1 (AFAP1L1), mRNA [NM_152406]                                                                                                                   | 3,66 |
| CDH7            | NM_004361       | ref Homo sapiens cadherin 7, type 2 (CDH7), transcript variant b, mRNA [NM_004361]                                                                                                                        | 3,65 |
| DENND2A         | NM_015689       | ref Homo sapiens DENN/MADD domain containing 2A (DENND2A), mRNA [NM_015689]                                                                                                                               | 3,65 |
| S1PR4           | NM_003775       | ref Homo sapiens sphingosine-1-phosphate receptor 4 (S1PR4), mRNA [NM_003775]                                                                                                                             | 3,65 |
| OR7A5           | NM_017506       | ref Homo sapiens olfactory receptor, family 7, subfamily A, member 5 (OR7A5), mRNA [NM_017506]                                                                                                            | 3,64 |
| KEL             | NM_000420       | ref Homo sapiens Kell blood group, metallo-endopeptidase (KEL), mRNA [NM_000420]                                                                                                                          | 3,64 |
| C9orf93         | NM_173550       | ref Homo sapiens chromosome 9 open reading frame 93 (C9orf93), mRNA [NM_173550]                                                                                                                           | 3,63 |
| LOC390595       | AK023802        | gb Homo sapiens cDNA FLJ13740 fis, clone PLACE3000199. [AK023802]                                                                                                                                         | 3,61 |
| THC2689504      | THC2689504      | thc Q5E4L1_VIBF1 (Q5E4L1) Suppressor/enhancer of lin-12, partial (6%) [THC2689504]                                                                                                                        | 3,61 |
| AA778291        | AA778291        | gb AA778291_z156d07.s1 Soares_pregnant_uterus_NbHPU Homo sapiens cDNA clone IMAGE:505933 3', mRNA sequence [AA778291]                                                                                     | 3,60 |
| WHSC1           | NM_007331       | ref Homo sapiens Wolf-Hirschhorn syndrome candidate 1 (WHSC1), transcript variant 8, mRNA [NM_007331]                                                                                                     | 3,60 |
| OLFM1           | NM_014279       | ref Homo sapiens olfactomedin 1 (OLFM1), transcript variant 1, mRNA [NM_014279]                                                                                                                           | 3,59 |
| LGI3            | NM_139278       | ref Homo sapiens leucine-rich repeat LGI family, member 3 (LGI3), mRNA [NM_139278]                                                                                                                        | 3,58 |
| CARD14          | NM_052819       | ref Homo sapiens caspase recruitment domain family, member 14 (CARD14), transcript variant 2, mRNA [NM_052819]                                                                                            | 3,57 |
| AP1S2           | NM_003916       | ref Homo sapiens adaptor-related protein complex 1, sigma 2 subunit (AP1S2), mRNA [NM_003916]                                                                                                             | 3,56 |
| SSU72           | AK023110        | gb Homo sapiens cDNA FLJ13048 fis, clone NT2RP3001399, weakly similar to SSU72 PROTEIN. [AK023110]                                                                                                        | 3,54 |
| SCARB1          | NM_005505       | ref Homo sapiens scavenger receptor class B, member 1 (SCARB1), transcript variant 1, mRNA [NM_005505]                                                                                                    | 3,53 |
| NAV2            | NM_182964       | ref Homo sapiens neuron navigator 2 (NAV2), transcript variant 1, mRNA [NM_182964]                                                                                                                        | 3,51 |
| PPARG1A         | NM_013261       | ref Homo sapiens peroxisome proliferator-activated receptor gamma, coactivator 1 alpha (PPARG1A), mRNA [NM_013261]                                                                                        | 3,51 |
| CNIH3           | NM_152495       | ref Homo sapiens cornichon homolog 3 (Drosophila) (CNIH3), mRNA [NM_152495]                                                                                                                               | 3,50 |
| TYR             | NM_000372       | ref Homo sapiens tyrosinase (oculocutaneous albinism IA) (TYR), mRNA [NM_000372]                                                                                                                          | 3,49 |
| FSTL4           | NM_015082       | ref Homo sapiens follistatin-like 4 (FSTL4), mRNA [NM_015082]                                                                                                                                             | 3,48 |
| NCALD           | NM_001040630    | ref Homo sapiens neurocalcin delta (NCALD), transcript variant 7, mRNA [NM_001040630]                                                                                                                     | 3,47 |
| VEGFB           | NM_003377       | ref Homo sapiens vascular endothelial growth factor B (VEGFB), mRNA [NM_003377]                                                                                                                           | 3,44 |

|                 |                 |                                                                                                                                                                      |      |
|-----------------|-----------------|----------------------------------------------------------------------------------------------------------------------------------------------------------------------|------|
| AK021785        | AK021785        | gb Homo sapiens cDNA FLJ11723 fis, clone HEMBA1005314. [AK021785]                                                                                                    | 3.44 |
| CPB1            | NM_001871       | ref Homo sapiens carboxypeptidase B1 (tissue) (CPB1), mRNA [NM_001871]                                                                                               | 3.43 |
| HSPB2           | NM_001541       | ref Homo sapiens heat shock 27kDa protein 2 (HSPB2), mRNA [NM_001541]                                                                                                | 3.42 |
| NR4A3           | NM_173198       | ref Homo sapiens nuclear receptor subfamily 4, group A, member 3 (NR4A3), transcript variant 2, mRNA [NM_173198]                                                     | 3.41 |
| GAS7            | NM_201433       | ref Homo sapiens growth arrest-specific 7 (GAS7), transcript variant c, mRNA [NM_201433]                                                                             | 3.41 |
| AF086187        | AF086187        | gb Homo sapiens full length insert cDNA clone ZC30H06. [AF086187]                                                                                                    | 3.41 |
| IGSF8           | NM_052868       | ref Homo sapiens immunoglobulin superfamily, member 8 (IGSF8), mRNA [NM_052868]                                                                                      | 3.41 |
| DHRS13          | NM_144683       | ref Homo sapiens dehydrogenase/reductase (SDR family) member 13 (DHRS13), mRNA [NM_144683]                                                                           | 3.39 |
| SEMA7A          | NM_003612       | ref Homo sapiens semaphorin 7A, GPI membrane anchor (John Milton Hagen blood group) (SEMA7A), mRNA [NM_003612]                                                       | 3.38 |
| MBOAT1          | NM_001080480    | ref Homo sapiens membrane bound O-acyltransferase domain containing 1 (MBOAT1), mRNA [NM_001080480]                                                                  | 3.38 |
| SILV            | NM_006928       | ref Homo sapiens silver homolog (mouse) (SILV), mRNA [NM_006928]                                                                                                     | 3.37 |
| ATP8A2          | NM_016529       | ref Homo sapiens ATPase, aminophospholipid transporter-like, class 1, type 8A, member 2 (ATP8A2), mRNA [NM_016529]                                                   | 3.37 |
| KIAA1598        | NM_018330       | ref Homo sapiens KIAA1598 (KIAA1598), transcript variant 2, mRNA [NM_018330]                                                                                         | 3.37 |
| OSBPL10         | NM_017784       | ref Homo sapiens oxysterol binding protein-like 10 (OSBPL10), mRNA [NM_017784]                                                                                       | 3.37 |
| SLAMF8          | NM_020125       | ref Homo sapiens SLAM family member 8 (SLAMF8), mRNA [NM_020125]                                                                                                     | 3.36 |
| ECM1            | NM_004425       | ref Homo sapiens extracellular matrix protein 1 (ECM1), transcript variant 1, mRNA [NM_004425]                                                                       | 3.35 |
| CFH             | NM_01014975     | ref Homo sapiens complement factor H (CFH), transcript variant 2, mRNA [NM_01014975]                                                                                 | 3.35 |
| NAP5            | NM_207363       | ref Homo sapiens Nck-associated protein 5 (NAP5), transcript variant 1, mRNA [NM_207363]                                                                             | 3.35 |
| CA12            | NM_001218       | ref Homo sapiens carbonic anhydrase XII (CA12), transcript variant 1, mRNA [NM_001218]                                                                               | 3.34 |
| FLJ21075        | NM_025031       | ref Homo sapiens hypothetical protein FLJ21075 (FLJ21075), mRNA [NM_025031]                                                                                          | 3.33 |
| C21orf90        | NR_026547       | ref Homo sapiens chromosome 21 open reading frame 90 (C21orf90), transcript variant 1, non-coding RNA [NR_026547]                                                    | 3.33 |
| TYR             | NM_000372       | ref Homo sapiens tyrosinase (oculocutaneous albinism IA) (TYR), mRNA [NM_000372]                                                                                     | 3.33 |
| RASSF4          | NM_032023       | ref Homo sapiens Ras association (RalGDS/AF-6) domain family member 4 (RASSF4), mRNA [NM_032023]                                                                     | 3.32 |
| FBXO2           | NM_012168       | ref Homo sapiens F-box protein 2 (FBXO2), mRNA [NM_012168]                                                                                                           | 3.31 |
| GDPD5           | NM_030792       | ref Homo sapiens glycerophosphodiester phosphodiesterase domain containing 5 (GDPD5), mRNA [NM_030792]                                                               | 3.31 |
| JRK             | NM_003724       | ref Homo sapiens jerky homolog (mouse) (JRK), transcript variant 1, mRNA [NM_003724]                                                                                 | 3.31 |
| ENST00000327299 | ENST00000327299 | ens Adenylate kinase isoenzyme 4, mitochondrial (EC 2.7.4.3)(Adenylate kinase 3-like)(ATP-AMP transphosphorylase) [Source:UniProtKB/Swiss-Prot;Acc:P221-7]           | 3.29 |
| CITED1          | NM_004143       | ref Homo sapiens Cbp/p300-interacting transactivator, with Glu/Asp-rich carboxy-terminal domain, 1 (CITED1), mRNA [NM_004143]                                        | 3.29 |
| GDPD5           | NM_030792       | ref Homo sapiens glycerophosphodiester phosphodiesterase domain containing 5 (GDPD5), mRNA [NM_030792]                                                               | 3.28 |
| FIGNL1          | NM_001042762    | ref Homo sapiens fidgetin-like 1 (FIGNL1), transcript variant 1, mRNA [NM_001042762]                                                                                 | 3.28 |
| DYNLT3          | NM_006520       | ref Homo sapiens dynein, light chain, Tctex-type 3 (DYNLT3), mRNA [NM_006520]                                                                                        | 3.28 |
| CKB             | NM_001823       | ref Homo sapiens creatine kinase, brain (CKB), mRNA [NM_001823]                                                                                                      | 3.28 |
| AMDHD2          | NM_015944       | ref Homo sapiens amidohydrolase domain containing 2 (AMDHD2), mRNA [NM_015944]                                                                                       | 3.27 |
| TRPM3           | NM_001007471    | ref Homo sapiens transient receptor potential cation channel, subfamily M, member 3 (TRPM3), transcript variant 9, mRNA [NM_001007471]                               | 3.27 |
| GPR143          | NM_000273       | ref Homo sapiens G protein-coupled receptor 143 (GPR143), mRNA [NM_000273]                                                                                           | 3.27 |
| THC2539492      | THC2539492      | thc CT091_HUMAN (Q5T1J6) Protein C20orf91, partial (66%) [THC2539492]                                                                                                | 3.26 |
| MAGEB6          | NM_173523       | ref Homo sapiens melanoma antigen family B, 6 (MAGEB6), mRNA [NM_173523]                                                                                             | 3.25 |
| ENPP1           | NM_006208       | ref Homo sapiens ectonucleotide pyrophosphatase/phosphodiesterase 1 (ENPP1), mRNA [NM_006208]                                                                        | 3.25 |
| PMP2            | NM_002677       | ref Homo sapiens peripheral myelin protein 2 (PMP2), mRNA [NM_002677]                                                                                                | 3.25 |
| ATP6V0D2        | NM_152565       | ref Homo sapiens ATPase, H+ transporting, lysosomal 38kDa, V0 subunit d2 (ATP6V0D2), mRNA [NM_152565]                                                                | 3.24 |
| CFH             | NM_000186       | ref Homo sapiens complement factor H (CFH), transcript variant 1, mRNA [NM_000186]                                                                                   | 3.24 |
| C1orf133        | NR_024337       | ref Homo sapiens chromosome 1 open reading frame 133 (C1orf133), non-coding RNA [NR_024337]                                                                          | 3.24 |
| DENN2A          | NM_015689       | ref Homo sapiens DENN/MADD domain containing 2A (DENN2A), mRNA [NM_015689]                                                                                           | 3.23 |
| MLLT10          | NM_001095959    | ref Homo sapiens myeloid/lymphoid or mixed-lineage leukemia (trithorax homolog, Drosophila); translocated to, 10 (MLLT10), transcript variant 2, mRNA [NM_001095959] | 3.23 |
| ENST00000327506 | ENST00000327506 | ens Protein LOC339766 [Source:UniProtKB/Swiss-Prot;Acc:A6NES4] [ENST00000327506]                                                                                     | 3.22 |
| BC047326        | BC047326        | gb Homo sapiens, clone IMAGE:5528960, mRNA. [BC047326]                                                                                                               | 3.21 |
| MAP7D2          | NM_152780       | ref Homo sapiens MAP7 domain containing 2 (MAP7D2), mRNA [NM_152780]                                                                                                 | 3.20 |
| NCRNA00084      | U60873          | gb Human clone 137308 mRNA, partial cds. [U60873]                                                                                                                    | 3.20 |
| GYPC            | NM_002101       | ref Homo sapiens glycoporphin C (Gerbich blood group) (GYPC), transcript variant 1, mRNA [NM_002101]                                                                 | 3.19 |
| FAM75A2         | NM_001040065    | ref Homo sapiens family with sequence similarity 75, member A2 (FAM75A2), mRNA [NM_001040065]                                                                        | 3.19 |
| STAC            | NM_003149       | ref Homo sapiens SH3 and cysteine rich domain (STAC), mRNA [NM_003149]                                                                                               | 3.18 |
| CR620043        | CR620043        | gb full-length cDNA clone CS0DC001YP21 of Neuroblastoma Cot 25-normalized of Homo sapiens (human). [CR620043]                                                        | 3.18 |
| SCML4           | NM_198081       | ref Homo sapiens sex comb on midleg-like 4 (Drosophila) (SCML4), mRNA [NM_198081]                                                                                    | 3.18 |
| TNS3            | NM_022748       | ref Homo sapiens tensin 3 (TNS3), mRNA [NM_022748]                                                                                                                   | 3.18 |
| ANKRD18A        | BC131497        | gb Homo sapiens cDNA clone IMAGE:40081082. [BC131497]                                                                                                                | 3.17 |
| PSMB10          | NM_002801       | ref Homo sapiens proteasome (prosome, macropain) subunit, beta type, 10 (PSMB10), mRNA [NM_002801]                                                                   | 3.17 |
| NBL1            | NM_182744       | ref Homo sapiens neuroblastoma, suppression of tumorigenicity 1 (NBL1), transcript variant 1, mRNA [NM_182744]                                                       | 3.17 |
| THC2696414      | THC2696414      | Unknown                                                                                                                                                              | 3.16 |
| GINS2           | NM_016095       | ref Homo sapiens GINS complex subunit 2 (Psf2 homolog) (GINS2), mRNA [NM_016095]                                                                                     | 3.16 |
| CTSA            | NM_000308       | ref Homo sapiens cathepsin A (CTSA), transcript variant 1, mRNA [NM_000308]                                                                                          | 3.16 |
| GM2A            | NM_000405       | ref Homo sapiens GM2 ganglioside activator (GM2A), mRNA [NM_000405]                                                                                                  | 3.16 |
| CHAF1B          | NM_005441       | ref Homo sapiens chromatin assembly factor 1, subunit B (p60) (CHAF1B), mRNA [NM_005441]                                                                             | 3.15 |
| AT_ssH_GD_3     | AT_ssH_GD_3     |                                                                                                                                                                      | 3.15 |
| A2M             | NM_000014       | ref Homo sapiens alpha-2-macroglobulin (A2M), mRNA [NM_000014]                                                                                                       | 3.14 |
| TPCN2           | NM_139075       | ref Homo sapiens two pore segment channel 2 (TPCN2), mRNA [NM_139075]                                                                                                | 3.13 |
| QDPR            | M16447          | gb Human dihydropteridine reductase (dHPR) mRNA, complete cds. [M16447]                                                                                              | 3.13 |
| CR618615        | CR618615        | gb full-length cDNA clone CL0BB018ZH05 of Neuroblastoma of Homo sapiens (human). [CR618615]                                                                          | 3.13 |
| THC2707492      | THC2707492      | Unknown                                                                                                                                                              | 3.12 |
| hCG_1774568     | BC004179        | gb Homo sapiens similar to hCG1774568, mRNA (cDNA clone IMAGE:2959703). **** WARNING: chimeric clone ****. [BC004179]                                                | 3.11 |
| P2RY2           | NM_176072       | ref Homo sapiens purinergic receptor P2Y, G-protein coupled, 2 (P2RY2), transcript variant 1, mRNA [NM_176072]                                                       | 3.10 |
| DTNA            | NM_001392       | ref Homo sapiens dystrobrevin, alpha (DTNA), transcript variant 7, mRNA [NM_001392]                                                                                  | 3.09 |
| BDH2            | NM_020139       | ref Homo sapiens 3-hydroxybutyrate dehydrogenase, type 2 (BDH2), mRNA [NM_020139]                                                                                    | 3.07 |
| CHAF1B          | NM_005441       | ref Homo sapiens chromatin assembly factor 1, subunit B (p60) (CHAF1B), mRNA [NM_005441]                                                                             | 3.07 |
| CHAF1B          | NM_005441       | ref Homo sapiens chromatin assembly factor 1, subunit B (p60) (CHAF1B), mRNA [NM_005441]                                                                             | 3.07 |
| NAP5            | NM_207481       | ref Homo sapiens Nck-associated protein 5 (NAP5), transcript variant 2, mRNA [NM_207481]                                                                             | 3.07 |
| ACP5            | NM_001611       | ref Homo sapiens acid phosphatase 5, tartrate resistant (ACP5), transcript variant 4, mRNA [NM_001611]                                                               | 3.06 |
| CHAF1B          | NM_005441       | ref Homo sapiens chromatin assembly factor 1, subunit B (p60) (CHAF1B), mRNA [NM_005441]                                                                             | 3.06 |
| AV749257        | AV749257        | gb AV749257 AV749257 NPC Homo sapiens cDNA clone NPCCBTB10 5', mRNA sequence [AV749257]                                                                              | 3.06 |
| SPAG4           | NM_003116       | ref Homo sapiens sperm associated antigen 4 (SPAG4), mRNA [NM_003116]                                                                                                | 3.05 |
| TM4SF19         | NM_138461       | ref Homo sapiens transmembrane 4 L six family member 19 (TM4SF19), mRNA [NM_138461]                                                                                  | 3.04 |
| BAAT            | NM_001701       | ref Homo sapiens bile acid Coenzyme 4: amino acid N-acyltransferase (glycine N-choloyltransferase) (BAAT), transcript variant 1, mRNA [NM_001701]                    | 3.04 |
| CHAF1B          | NM_005441       | ref Homo sapiens chromatin assembly factor 1, subunit B (p60) (CHAF1B), mRNA [NM_005441]                                                                             | 3.04 |
| PEL13           | NM_145065       | ref Homo sapiens pellino homolog 3 (Drosophila) (PEL13), transcript variant 1, mRNA [NM_145065]                                                                      | 3.04 |
| TPK1            | NM_022445       | ref Homo sapiens thiamin pyrophosphokinase 1 (TPK1), transcript variant 1, mRNA [NM_022445]                                                                          | 3.03 |
| FCGR2A          | NM_021642       | ref Homo sapiens Fc fragment of IgG, low affinity IIa, receptor (CD32) (FCGR2A), transcript variant 2, mRNA [NM_021642]                                              | 3.03 |
| CHAF1B          | NM_005441       | ref Homo sapiens chromatin assembly factor 1, subunit B (p60) (CHAF1B), mRNA [NM_005441]                                                                             | 3.03 |
| FBLIM1          | NM_017556       | ref Homo sapiens filamin binding LIM protein 1 (FBLIM1), transcript variant 1, mRNA [NM_017556]                                                                      | 3.02 |
| CHAF1B          | NM_005441       | ref Homo sapiens chromatin assembly factor 1, subunit B (p60) (CHAF1B), mRNA [NM_005441]                                                                             | 3.02 |
| C10orf59        | NM_001031709    | ref Homo sapiens chromosome 10 open reading frame 59 (C10orf59), transcript variant 1, mRNA [NM_001031709]                                                           | 3.02 |
| SPDYA           | NM_001008779    | ref Homo sapiens speedy homolog A (Xenopus laevis) (SPDYA), transcript variant 2, mRNA [NM_001008779]                                                                | 3.02 |
| AK055428        | AK055428        | gb Homo sapiens cDNA FLJ30866 fis, clone FEBRA2004110, highly similar to PHOSPHOLIPASE ADRAB-B PRECURSOR (EC 3.1.-.-). [AK055428]                                    | 3.02 |
| P DPR           | NM_017990       | ref Homo sapiens pyruvate dehydrogenase phosphatase regulatory subunit (P DPR), mRNA [NM_017990]                                                                     | 2.99 |
| LOC388588       | NR_024432       | ref Homo sapiens hypothetical LOC388588 (LOC388588), non-coding RNA [NR_024432]                                                                                      | 2.99 |
| IMMP2L          | NM_032549       | ref Homo sapiens IMP2 inner mitochondrial membrane peptidase-like (S. cerevisiae) (IMMP2L), nuclear gene encoding mitochondrial protein, mRNA [NM_032549]            | 2.99 |
| CHAF1B          | NM_005441       | ref Homo sapiens chromatin assembly factor 1, subunit B (p60) (CHAF1B), mRNA [NM_005441]                                                                             | 2.99 |
| MET             | NM_000245       | ref Homo sapiens met proto-oncogene (hepatocyte growth factor receptor) (MET), transcript variant 2, mRNA [NM_000245]                                                | 2.98 |
| BC008001        | BC008001        | gb Homo sapiens mRNA similar to hypothetical protein FLJ21463 (cDNA clone IMAGE:3504595). [BC008001]                                                                 | 2.98 |
| FCGR2B          | NM_004001       | ref Homo sapiens Fc fragment of IgG, low affinity IIb, receptor (CD32) (FCGR2B), transcript variant 1, mRNA [NM_004001]                                              | 2.98 |
| CHAF1B          | NM_005441       | ref Homo sapiens chromatin assembly factor 1, subunit B (p60) (CHAF1B), mRNA [NM_005441]                                                                             | 2.97 |
| MARCH3          | NM_178450       | ref Homo sapiens membrane-associated ring finger (C3HC4) 3 (MARCH3), mRNA [NM_178450]                                                                                | 2.97 |
| THC2533854      | THC2533854      | thc Q2NUU5_SODGM (Q2NUU5) Glutamate-aspartate ABC transporter ATP-binding component GIL, partial (7%) [THC2533854]                                                   | 2.97 |
| LAMP3           | NM_014398       | ref Homo sapiens lysosomal-associated membrane protein 3 (LAMP3), mRNA [NM_014398]                                                                                   | 2.95 |
| NDRG4           | NM_022910       | ref Homo sapiens NDRG family member 4 (NDRG4), transcript variant 3, mRNA [NM_022910]                                                                                | 2.95 |
| HIST1H4L        | NM_003546       | ref Homo sapiens histone cluster 1, H4l (HIST1H4L), mRNA [NM_003546]                                                                                                 | 2.95 |
| ADAM23          | NM_003812       | ref Homo sapiens ADAM metalloproteinase domain 23 (ADAM23), mRNA [NM_003812]                                                                                         | 2.94 |
| LIMCH1          | NM_014988       | ref Homo sapiens LIM and calponin homology domains 1 (LIMCH1), transcript variant 1, mRNA [NM_014988]                                                                | 2.94 |
| NAV2            | NM_182964       | ref Homo sapiens neuron navigator 2 (NAV2), transcript variant 1, mRNA [NM_182964]                                                                                   | 2.93 |
| TLR4            | NM_138554       | ref Homo sapiens toll-like receptor 4 (TLR4), transcript variant 1, mRNA [NM_138554]                                                                                 | 2.93 |
| ENST00000372142 | ENST00000372142 | ens Pro-neuregulin-3, membrane-bound isoform Precursor (Pro-NRG3) [Contains Neuregulin-3(NRG-3)] [Source:UniProtKB/Swiss-Prot;Acc:P56975] [ENST00000372142]          | 2.92 |
| AB362555        | AB362555        | ref Homo sapiens HLA-DMB mRNA for MHC class II antigen, partial cds. [AB362555]                                                                                      | 2.91 |
| CHAF1B          | NM_005441       | ref Homo sapiens chromatin assembly factor 1, subunit B (p60) (CHAF1B), mRNA [NM_005441]                                                                             | 2.90 |

|              |                 |                                                                                                                                 |      |
|--------------|-----------------|---------------------------------------------------------------------------------------------------------------------------------|------|
| TTYH2        | NM_032646       | ref Homo sapiens tweety homolog 2 (Drosophila) (TTYH2), transcript variant 1, mRNA [NM_032646]                                  | 2,90 |
| TP53TG3      | NM_016212       | ref Homo sapiens TP53 target 3 (TP53TG3), mRNA [NM_016212]                                                                      | 2,90 |
| HIST1H4C     | NM_003542       | ref Homo sapiens histone cluster 1, H4c (HIST1H4C), mRNA [NM_003542]                                                            | 2,89 |
| SNCB         | NM_001001502    | ref Homo sapiens synuclein, beta (SNCB), transcript variant 1, mRNA [NM_001001502]                                              | 2,88 |
| BCL2A1       | NM_004049       | ref Homo sapiens BCL2-related protein A1 (BCL2A1), transcript variant 1, mRNA [NM_004049]                                       | 2,87 |
| C9orf91      | NM_153045       | ref Homo sapiens chromosome 9 open reading frame 91 (C9orf91), mRNA [NM_153045]                                                 | 2,86 |
| ESPN         | NM_031475       | ref Homo sapiens espin (ESPN), mRNA [NM_031475]                                                                                 | 2,86 |
| GULP1        | NM_016315       | ref Homo sapiens GULP, engulfment adaptor PTB domain containing 1 (GULP1), mRNA [NM_016315]                                     | 2,86 |
| ZNF778       | NM_182531       | ref Homo sapiens zinc finger protein 778 (ZNF778), mRNA [NM_182531]                                                             | 2,86 |
| ECOP         | NM_030796       | ref Homo sapiens EGFR-coamplified and overexpressed protein (ECOP), mRNA [NM_030796]                                            | 2,85 |
| RFX6         | NM_173560       | ref Homo sapiens regulatory factor X, 6 (RFX6), mRNA [NM_173560]                                                                | 2,84 |
| DENND2D      | AL713773        | Unknown                                                                                                                         | 2,83 |
| MYB          | NM_005375       | ref Homo sapiens v-myb myeloblastosis viral oncogene homolog (avian) (MYB), transcript variant 2, mRNA [NM_005375]              | 2,82 |
| A_24_P127063 | A_24_P127063    | Unknown                                                                                                                         | 2,81 |
| CREB3L2      | BC063666        | gb Homo sapiens cAMP responsive element binding protein 3-like 2, mRNA (cDNA clone IMAGE:4185677), complete cds. [BC063666]     | 2,79 |
| DQ786230     | DQ786230        | gb Homo sapiens clone HLS_IMAGE_1706664 mRNA sequence. [DQ786230]                                                               | 2,77 |
| RASSF4       | NM_032023       | ref Homo sapiens Ras association (RalGDS/AF-6) domain family member 4 (RASSF4), mRNA [NM_032023]                                | 2,77 |
| GRAP         | NM_006613       | ref Homo sapiens GRB2-related adaptor protein (GRAP), mRNA [NM_006613]                                                          | 2,77 |
| FGGY         | NM_018291       | ref Homo sapiens FGGY carbohydrate kinase domain containing (FGGY), transcript variant 2, mRNA [NM_018291]                      | 2,75 |
| STARD8       | NM_014725       | ref Homo sapiens STAR-related lipid transfer (START) domain containing 8 (STARD8), transcript variant 2, mRNA [NM_014725]       | 2,75 |
| SNN          | NM_003498       | ref Homo sapiens stannin (SNN), mRNA [NM_003498]                                                                                | 2,75 |
| TRPM6        | NM_017662       | ref Homo sapiens transient receptor potential cation channel, subfamily M, member 6 (TRPM6), mRNA [NM_017662]                   | 2,74 |
| GLB1L3       | NM_001080407    | ref Homo sapiens galactosidase, beta 1-like 3 (GLB1L3), mRNA [NM_001080407]                                                     | 2,74 |
| PXMP2        | NM_018663       | ref Homo sapiens peroxisomal membrane protein 2, 22kDa (PXMP2), mRNA [NM_018663]                                                | 2,73 |
| SLC37A2      | NM_198277       | ref Homo sapiens solute carrier family 37 (glycerol-3-phosphate transporter), member 2 (SLC37A2), mRNA [NM_198277]              | 2,72 |
| CCR7         | NM_001838       | ref Homo sapiens chemokine (C-C motif) receptor 7 (CCR7), mRNA [NM_001838]                                                      | 2,71 |
| A_32_P93792  | A_32_P93792     | Unknown                                                                                                                         | 2,71 |
| OLFM1        | NM_006334       | ref Homo sapiens olfactomedin 1 (OLFM1), transcript variant 2, mRNA [NM_006334]                                                 | 2,70 |
| CACNA1G      | NM_018896       | ref Homo sapiens calcium channel, voltage-dependent, T type, alpha 1G subunit (CACNA1G), transcript variant 1, mRNA [NM_018896] | 2,70 |
| CHCHD7       | NM_001011667    | ref Homo sapiens coiled-coil-helix-coiled-coil-helix domain containing 7 (CHCHD7), transcript variant 1, mRNA [NM_001011667]    | 2,70 |
| C5orf47      | ENST00000340147 | ens Uncharacterized protein C5orf47 [Source:UniProtKB/Swiss-Prot;Acc:Q569G3] [ENST00000340147]                                  | 2,70 |
| SLC5A4       | NM_014227       | ref Homo sapiens solute carrier family 5 (low affinity glucose cotransporter), member 4 (SLC5A4), mRNA [NM_014227]              | 2,70 |
| TMCC3        | NM_020698       | ref Homo sapiens transmembrane and coiled-coil domain family 3 (TMCC3), mRNA [NM_020698]                                        | 2,70 |
| THC2750781   | THC2750781      | Unknown                                                                                                                         | 2,69 |
| CTSA         | NM_000308       | ref Homo sapiens cathepsin A (CTSA), transcript variant 1, mRNA [NM_000308]                                                     | 2,68 |
| ACN9         | NM_020186       | ref Homo sapiens ACN9 homolog (S. cerevisiae) (ACN9), mRNA [NM_020186]                                                          | 2,65 |
| WISP2        | NM_003881       | ref Homo sapiens WNT1 inducible signaling pathway protein 2 (WISP2), mRNA [NM_003881]                                           | 2,65 |
| DHRS13       | NM_144683       | ref Homo sapiens dehydrogenase/reductase (SDR family) member 13 (DHRS13), mRNA [NM_144683]                                      | 2,65 |
| TP53TG3      | NM_016212       | ref Homo sapiens TP53 target 3 (TP53TG3), mRNA [NM_016212]                                                                      | 2,64 |
| OXNAD1       | NM_138381       | ref Homo sapiens oxidoreductase NAD-binding domain containing 1 (OXNAD1), mRNA [NM_138381]                                      | 2,63 |
| BC015977     | BC015977        | gb Homo sapiens, clone IMAGE:4042121, mRNA, partial cds. [BC015977]                                                             | 2,61 |
| MGC16025     | BC008026        | gb Homo sapiens hypothetical protein MGC16025, mRNA (cDNA clone MGC:16025 IMAGE:3607793), complete cds. [BC008026]              | 2,61 |
| RAD51L1      | NM_133510       | ref Homo sapiens RAD51-like 1 (S. cerevisiae) (RAD51L1), transcript variant 2, mRNA [NM_133510]                                 | 2,58 |
| RBM33        | BC011923        | gb Homo sapiens RNA binding motif protein 33, mRNA (cDNA clone IMAGE:4542314), complete cds. [BC011923]                         | 2,52 |
