# Supplementary material for: MITF-Independent Pro-Survival Role of BRG1-Containing SWI/SNF Complex in Melanoma Cells
Source: PubMed Central journal article supplement (PMC3547967; doi:10.1371/journal.pone.0054110), 2013-01-17
Supplement: pone.0054110.s005.pdf [file pone.0054110.s005.pdf]

**Supplementary Table 2. Known MITF target genes downregulated more than 2-fold by Brg1 knockdown in 501mel cells (P<0.005). (MITF itself was downregulated ~5-fold).**

| <b>Gene symbol</b> | <b>Gene name</b>                                                                                                 | <b>Genebank</b> | <b>-fold</b> |
|--------------------|------------------------------------------------------------------------------------------------------------------|-----------------|--------------|
| DCT                | dopachrome tautomerase (dopachrome delta-isomerase, tyrosine-related protein 2) (DCT),transcript variant 1, mRNA | NM_001922       | 22.50        |
| TRPM1              | transient receptor potential cation channel, subfamily M, member 1 (TRPM1), mRNA                                 | NM_002420       | 15.98        |
| MLANA              | melan-A (MLANA), mRNA                                                                                            | NM_005511       | 10.76        |
| RAB27A             | RAB27A, member RAS oncogene family (RAB27A), transcript variant 1, mRNA                                          | NM_004580       | 6.72         |
| BIRC7              | baculoviral IAP repeat-containing 7 (BIRC7), transcript variant 2, mRNA                                          | NM_022161       | 5.85         |
| CDK2               | cyclin-dependent kinase 2 (CDK2), transcript variant 1, mRNA                                                     | NM_001798       | 4.98         |
| TYRP1              | tyrosinase-related protein 1 (TYRP1), mRNA                                                                       | NM_000550       | 4.98         |
| SILV               | silver homolog (mouse) (SILV), mRNA                                                                              | NM_006928       | 4.21         |
| SLC45A2            | solute carrier family 45, member 2 (SLC45A2), transcript variant 1, mRNA                                         | NM_016180       | 4.12         |
| SNAI2              | snail homolog 2 (Drosophila) (SNAI2), mRNA                                                                       | NM_003068       | 3,76         |
| TYR                | tyrosinase (oculocutaneous albinism IA) (TYR), mRNA                                                              | NM_000372       | 3.49         |
| GPR143             | G protein-coupled receptor 143 (GPR143), mRNA                                                                    | NM_000273       | 3.27         |
| MET                | met proto-oncogene (hepatocyte growth factor receptor) (MET), transcript variant 2, mRNA                         | NM_000245       | 2.98         |
| BCL2               | B-cell CLL/lymphoma 2 (BCL2), nuclear gene encoding mitochondrial protein, transcript variant alpha, mRNA        | NM_000633       | 2.38         |
| EDNRB              | endothelin receptor type B (EDNRB), transcript variant 2, mRNA                                                   | NM_003991       | 2.23         |
