# Supplementary material for: MITF-Independent Pro-Survival Role of BRG1-Containing SWI/SNF Complex in Melanoma Cells
Source: PubMed Central journal article supplement (PMC3547967; doi:10.1371/journal.pone.0054110), 2013-01-17
Supplement: pone.0054110.s006.pdf [file pone.0054110.s006.pdf]

Supplementary Table S3. Microarray analysis of genes up-regulated >2-fold (P<0.005) by Brg1 depletion in 501mel cells.

| Gene Symbol  | Systematic Name | Gene Title                                                                                                                           | Fold change |
|--------------|-----------------|--------------------------------------------------------------------------------------------------------------------------------------|-------------|
| COL13A1      | NM_005203       | ref Homo sapiens collagen, type XIII, alpha 1 (COL13A1), transcript variant 1, mRNA [NM_005203]                                      | 23.203      |
| COL13A1      | NM_005203       | ref Homo sapiens collagen, type XIII, alpha 1 (COL13A1), transcript variant 1, mRNA [NM_005203]                                      | 20.793      |
| COL13A1      | NM_005203       | ref Homo sapiens collagen, type XIII, alpha 1 (COL13A1), transcript variant 1, mRNA [NM_005203]                                      | 20.769      |
| COL13A1      | NM_005203       | ref Homo sapiens collagen, type XIII, alpha 1 (COL13A1), transcript variant 1, mRNA [NM_005203]                                      | 19.676      |
| COL13A1      | NM_005203       | ref Homo sapiens collagen, type XIII, alpha 1 (COL13A1), transcript variant 1, mRNA [NM_005203]                                      | 19.074      |
| NPTX1        | NM_002522       | ref Homo sapiens neuronal pentraxin I (NPTX1), mRNA [NM_002522]                                                                      | 18.548      |
| COL13A1      | NM_005203       | ref Homo sapiens collagen, type XIII, alpha 1 (COL13A1), transcript variant 1, mRNA [NM_005203]                                      | 18.126      |
| HMGCS1       | NM_002130       | ref Homo sapiens 3-hydroxy-3-methylglutaryl-Coenzyme A synthase 1 (soluble) (HMGCS1), transcript variant 2, mRNA [NM_002130]         | 15.489      |
| COL13A1      | NM_005203       | ref Homo sapiens collagen, type XIII, alpha 1 (COL13A1), transcript variant 1, mRNA [NM_005203]                                      | 14.214      |
| COL13A1      | NM_005203       | ref Homo sapiens collagen, type XIII, alpha 1 (COL13A1), transcript variant 1, mRNA [NM_005203]                                      | 14.073      |
| CXCL14       | NM_004887       | ref Homo sapiens chemokine (C-X-C motif) ligand 14 (CXCL14), mRNA [NM_004887]                                                        | 13.918      |
| COL13A1      | NM_005203       | ref Homo sapiens collagen, type XIII, alpha 1 (COL13A1), transcript variant 1, mRNA [NM_005203]                                      | 12.630      |
| COL13A1      | NM_005203       | ref Homo sapiens collagen, type XIII, alpha 1 (COL13A1), transcript variant 1, mRNA [NM_005203]                                      | 11.752      |
| KRT34        | NM_021013       | ref Homo sapiens keratin 34 (KRT34), mRNA [NM_021013]                                                                                | 11.283      |
| COL13A1      | NM_005203       | ref Homo sapiens collagen, type XIII, alpha 1 (COL13A1), transcript variant 1, mRNA [NM_005203]                                      | 10.367      |
| HMGCS1       | NM_002130       | ref Homo sapiens 3-hydroxy-3-methylglutaryl-Coenzyme A synthase 1 (soluble) (HMGCS1), transcript variant 2, mRNA [NM_002130]         | 10.278      |
| ITGA1        | NM_181501       | ref Homo sapiens integrin, alpha 1 (ITGA1), mRNA [NM_181501]                                                                         | 10.271      |
| KCNN4        | NM_002250       | ref Homo sapiens potassium intermediate/small conductance calcium-activated channel, subfamily N, member 4 (KCNN4), mRNA [NM_002250] | 9.800       |
| THC2681410   | THC2681410      | Unknown                                                                                                                              | 9.550       |
| HIST2H2AA4   | NM_001040874    | ref Homo sapiens histone cluster 2, H2aa4 (HIST2H2AA4), mRNA [NM_001040874]                                                          | 9.185       |
| HIST2H2AA4   | NM_001040874    | ref Homo sapiens histone cluster 2, H2aa4 (HIST2H2AA4), mRNA [NM_001040874]                                                          | 8.980       |
| HSD17B7P2    | AF165514        | gb Homo sapiens 17-beta-hydroxysteroid dehydrogenase type VII isoform mRNA, complete cds. [AF165514]                                 | 8.211       |
| ACAT2        | NM_005891       | ref Homo sapiens acetyl-Coenzyme A acetyltransferase 2 (ACAT2), mRNA [NM_005891]                                                     | 8.175       |
| A_23_P147404 | A_23_P147404    | Unknown                                                                                                                              | 7.967       |
| ACAT2        | NM_005891       | ref Homo sapiens acetyl-Coenzyme A acetyltransferase 2 (ACAT2), mRNA [NM_005891]                                                     | 7.966       |
| LSS          | NM_001001438    | ref Homo sapiens lanosterol synthase (2,3-oxidosqualene-lanosterol cyclase) (LSS), transcript variant 2, mRNA [NM_001001438]         | 7.672       |
| NPTX1        | NM_002522       | ref Homo sapiens neuronal pentraxin I (NPTX1), mRNA [NM_002522]                                                                      | 7.658       |
| HSD17B7      | NM_016371       | ref Homo sapiens hydroxysteroid (17-beta) dehydrogenase 7 (HSD17B7), mRNA [NM_016371]                                                | 7.635       |
| HSD17B7      | NM_016371       | ref Homo sapiens hydroxysteroid (17-beta) dehydrogenase 7 (HSD17B7), mRNA [NM_016371]                                                | 7.312       |
| ID1          | NM_004508       | ref Homo sapiens isopentenyl-diphosphate delta isomerase 1 (ID1), mRNA [NM_004508]                                                   | 7.103       |
| MST150       | NM_032947       | ref Homo sapiens MSTP150 (MST150), mRNA [NM_032947]                                                                                  | 7.028       |
| DKK1         | NM_012242       | ref Homo sapiens dickkopf homolog 1 (Xenopus laevis) (DKK1), mRNA [NM_012242]                                                        | 7.023       |
| HIST1H2AD    | NM_021065       | ref Homo sapiens histone cluster 1, H2ad (HIST1H2AD), mRNA [NM_021065]                                                               | 6.921       |
| TMEM158      | NM_015444       | ref Homo sapiens transmembrane protein 158 (TMEM158), mRNA [NM_015444]                                                               | 6.886       |
| LDLR         | NM_000527       | ref Homo sapiens low density lipoprotein receptor (LDLR), mRNA [NM_000527]                                                           | 6.476       |
| IL3RA        | NM_002183       | ref Homo sapiens interleukin 3 receptor, alpha (low affinity) (IL3RA), mRNA [NM_002183]                                              | 6.409       |
| IL21R        | NM_181078       | ref Homo sapiens interleukin 21 receptor (IL21R), transcript variant 2, mRNA [NM_181078]                                             | 6.344       |
| LSS          | NM_001001438    | ref Homo sapiens lanosterol synthase (2,3-oxidosqualene-lanosterol cyclase) (LSS), transcript variant 2, mRNA [NM_001001438]         | 6.340       |
| HIST1H1C     | NM_005319       | ref Homo sapiens histone cluster 1, H1c (HIST1H1C), mRNA [NM_005319]                                                                 | 6.301       |
| EGR4         | NM_001965       | ref Homo sapiens early growth response 4 (EGR4), mRNA [NM_001965]                                                                    | 6.293       |
| HIST2H2AB    | NM_175065       | ref Homo sapiens histone cluster 2, H2ab (HIST2H2AB), mRNA [NM_175065]                                                               | 6.230       |
| LRRN3        | NM_018334       | ref Homo sapiens leucine rich repeat neuronal 3 (LRRN3), transcript variant 3, mRNA [NM_018334]                                      | 6.210       |
| SC4MOL       | NM_006745       | ref Homo sapiens sterol-C4-methyl oxidase-like (SC4MOL), transcript variant 1, mRNA [NM_006745]                                      | 6.173       |
| LDLR         | NM_000527       | ref Homo sapiens low density lipoprotein receptor (LDLR), mRNA [NM_000527]                                                           | 6.126       |
| CADPS        | NM_183393       | ref Homo sapiens Ca++-dependent secretion activator (CADPS), transcript variant 3, mRNA [NM_183393]                                  | 6.054       |
| CDKN2B       | NM_078487       | ref Homo sapiens cyclin-dependent kinase inhibitor 2B (p15, inhibits CDK4) (CDKN2B), transcript variant 2, mRNA [NM_078487]          | 6.004       |
| NSDHL        | NM_015922       | ref Homo sapiens NAD(P) dependent steroid dehydrogenase-like (NSDHL), transcript variant 1, mRNA [NM_015922]                         | 5.936       |
| AW993939     | AW993939        | gb AW993939 RC1-BN0035-130400-013-b06 BN0035 Homo sapiens cDNA, mRNA sequence [AW993939]                                             | 5.926       |
| CR603951     | CR603951        | gb full-length cDNA clone CS0DM011YCC22 of Fetal liver of Homo sapiens (human). [CR603951]                                           | 5.865       |
| FDPS         | NM_020204       | ref Homo sapiens farnesyl diphosphate synthase (farnesyl pyrophosphate synthetase, dimethylallyltransferase, geranyltrans            | 5.800       |
| UNC5B        | NM_170744       | ref Homo sapiens unc-5 homolog B (C. elegans) (UNC5B), mRNA [NM_170744]                                                              | 5.763       |
| PPFIBP1      | NM_003622       | ref Homo sapiens PTPRF interacting protein, binding protein 1 (liprin beta 1) (PPFIBP1), transcript variant 1, mRNA [NM_003622]      | 5.756       |
| A_23_P170713 | A_23_P170713    | Unknown                                                                                                                              | 5.751       |
| ACSS2        | NM_018677       | ref Homo sapiens acyl-CoA synthetase short-chain family member 2 (ACSS2), transcript variant 1, mRNA [NM_018677]                     | 5.729       |
| HIST1H2AE    | NM_021052       | ref Homo sapiens histone cluster 1, H2ae (HIST1H2AE), mRNA [NM_021052]                                                               | 5.681       |
| ADAM19       | NM_033274       | ref Homo sapiens ADAM metalloproteinase domain 19 (metrin beta) (ADAM19), transcript variant 2, mRNA [NM_033274]                     | 5.681       |
| GZMA         | NM_006144       | ref Homo sapiens granzyme A (granzyme 1, cytotoxic T-lymphocyte-associated serine esterase 3) (GZMA), mRNA [NM_006144]               | 5.661       |
| SLC1A3       | NM_004172       | ref Homo sapiens solute carrier family 1 (glial high affinity glutamate transporter), member 3 (SLC1A3), mRNA [NM_004172]            | 5.641       |
| X15674       | X15674          | gb Human pTR5 mRNA for repetitive sequence. [X15674]                                                                                 | 5.571       |
| FDPSSL2A     | NR_003262       | ref Homo sapiens MGC44478 (FDPSSL2A), non-coding RNA [NR_003262]                                                                     | 5.566       |
| PPFIBP1      | NM_003622       | ref Homo sapiens PTPRF interacting protein, binding protein 1 (liprin beta 1) (PPFIBP1), transcript variant 1, mRNA [NM_003622]      | 5.518       |
| INSIG1       | NM_198336       | ref Homo sapiens insulin induced gene 1 (INSIG1), transcript variant 2, mRNA [NM_198336]                                             | 5.457       |
| MVK          | NM_000431       | ref Homo sapiens mevalonate kinase (MVK), transcript variant 1, mRNA [NM_000431]                                                     | 5.366       |
| VWCE         | NM_152718       | ref Homo sapiens von Willebrand factor C and EGF domains (VWCE), mRNA [NM_152718]                                                    | 5.356       |
| HIST2H2AC    | NM_003517       | ref Homo sapiens histone cluster 2, H2ac (HIST2H2AC), mRNA [NM_003517]                                                               | 5.303       |
| PPFIBP1      | NM_003622       | ref Homo sapiens PTPRF interacting protein, binding protein 1 (liprin beta 1) (PPFIBP1), transcript variant 1, mRNA [NM_003622]      | 5.295       |
| PMEP1A       | NM_020182       | ref Homo sapiens prostate transmembrane protein, androgen induced 1 (PMEP1A), transcript variant 1, mRNA [NM_020182]                 | 5.225       |
| A_24_P67268  | A_24_P67268     | Unknown                                                                                                                              | 5.225       |
| THC2523793   | THC2523793      | thc Q9DC07_MOUSE (Q9DC07) Adult male lung cDNA, RIKEN full-length enriched library, clone:1200007021 product:LIM AND                 | 5.216       |
| BMP6         | NM_001718       | ref Homo sapiens bone morphogenetic protein 6 (BMP6), mRNA [NM_001718]                                                               | 5.082       |
| TGFB1        | NM_000358       | ref Homo sapiens transforming growth factor, beta-induced, 68kDa (TGFB1), mRNA [NM_000358]                                           | 5.081       |
| ACSS2        | NM_018677       | ref Homo sapiens acyl-CoA synthetase short-chain family member 2 (ACSS2), transcript variant 1, mRNA [NM_018677]                     | 5.055       |
| ANKRD36B     | AK024934        | gb Homo sapiens cDNA: FLJ12181 fis, clone COL01904. [AK024934]                                                                       | 5.019       |
| RIMS3        | NM_014747       | ref Homo sapiens regulating synaptic membrane exocytosis 3 (RIMS3), mRNA [NM_014747]                                                 | 5.010       |
| CDKN2B       | NM_004936       | ref Homo sapiens cyclin-dependent kinase inhibitor 2B (p15, inhibits CDK4) (CDKN2B), transcript variant 1, mRNA [NM_004936]          | 4.996       |
| DHCR7        | NM_001360       | ref Homo sapiens 7-dehydrocholesterol reductase (DHCR7), mRNA [NM_001360]                                                            | 4.985       |
| CXCL1        | NM_001511       | ref Homo sapiens chemokine (C-X-C motif) ligand 1 (melanoma growth stimulating activity, alpha) (CXCL1), mRNA [NM_001511]            | 4.843       |
| EIF4G3       | NM_003760       | ref Homo sapiens eukaryotic translation initiation factor 4 gamma, 3 (EIF4G3), mRNA [NM_003760]                                      | 4.832       |
| TMEM55B      | NM_144568       | ref Homo sapiens transmembrane protein 55B (TMEM55B), transcript variant 2, mRNA [NM_144568]                                         | 4.810       |
| IQCD         | NM_138451       | ref Homo sapiens IQ motif containing D (IQCD), mRNA [NM_138451]                                                                      | 4.805       |
| FDFT1        | NM_004462       | ref Homo sapiens farnesyl-diphosphate farnesyltransferase 1 (FDFT1), mRNA [NM_004462]                                                | 4.688       |
| PLAC2        | BC036545        | gb Homo sapiens placenta-specific 2 (non-protein coding), mRNA (cDNA clone MGC:43133 IMAGE:5261222), complete cds. [BC036545]        | 4.656       |
| USP36        | AK022913        | gb Homo sapiens cDNA FLJ12851 fis, clone NT2RFP2003401, weakly similar to UBIQUITIN CARBOXYL-TERMINAL HYDROLASE 5                    | 4.628       |
| KIAA1683     | NM_025249       | ref Homo sapiens KIAA1683 (KIAA1683), mRNA [NM_025249]                                                                               | 4.620       |
| ATP2A1       | NM_173201       | ref Homo sapiens ATPase, Ca++ transporting, cardiac muscle, fast twitch 1 (ATP2A1), transcript variant a, mRNA [NM_173201]           | 4.619       |
| JAM2         | NM_021219       | ref Homo sapiens junctional adhesion molecule 2 (JAM2), mRNA [NM_021219]                                                             | 4.608       |
| WDR37        | NM_014023       | ref Homo sapiens WD repeat domain 37 (WDR37), mRNA [NM_014023]                                                                       | 4.580       |
| CYR61        | NM_001554       | ref Homo sapiens cysteine-rich, angiogenic inducer, 61 (CYR61), mRNA [NM_001554]                                                     | 4.578       |
| HMGCR        | NM_000859       | ref Homo sapiens 3-hydroxy-3-methylglutaryl-Coenzyme A reductase (HMGCR), transcript variant 1, mRNA [NM_000859]                     | 4.562       |
| DOCK4        | NM_014705       | ref Homo sapiens dedicator of cytokinesis 4 (DOCK4), mRNA [NM_014705]                                                                | 4.554       |
| ANKRD23      | NM_144994       | ref Homo sapiens ankyrin repeat domain 23 (ANKRD23), mRNA [NM_144994]                                                                | 4.512       |
| C14orf1      | NM_007176       | ref Homo sapiens chromosome 14 open reading frame 1 (C14orf1), mRNA [NM_007176]                                                      | 4.484       |
| FAM105A      | NM_019018       | ref Homo sapiens family with sequence similarity 105, member A (FAM105A), mRNA [NM_019018]                                           | 4.457       |
| MVK          | NM_000431       | ref Homo sapiens mevalonate kinase (MVK), transcript variant 1, mRNA [NM_000431]                                                     | 4.452       |
| A_24_P834646 | A_24_P834646    | Unknown                                                                                                                              | 4.450       |
| SQLE         | NM_003129       | ref Homo sapiens squalene epoxidase (SQLE), mRNA [NM_003129]                                                                         | 4.449       |
| MVD          | NM_002461       | ref Homo sapiens mevalonate (diphospho) decarboxylase (MVD), mRNA [NM_002461]                                                        | 4.423       |
| LMO2         | NM_005574       | ref Homo sapiens LIM domain only 2 (rhombotin-like 1) (LMO2), transcript variant 1, mRNA [NM_005574]                                 | 4.357       |
| ASGR1        | NM_001671       | ref Homo sapiens asialoglycoprotein receptor 1 (ASGR1), mRNA [NM_001671]                                                             | 4.330       |
| LMO2         | NM_005574       | ref Homo sapiens LIM domain only 2 (rhombotin-like 1) (LMO2), transcript variant 1, mRNA [NM_005574]                                 | 4.325       |
| IL22RA1      | NM_021258       | ref Homo sapiens interleukin 22 receptor, alpha 1 (IL22RA1), mRNA [NM_021258]                                                        | 4.274       |
| PEG10        | NM_001040152    | ref Homo sapiens paternally expressed 10 (PEG10), transcript variant 1, mRNA [NM_001040152]                                          | 4.257       |

|              |                 |                                                                                                                                                |       |
|--------------|-----------------|------------------------------------------------------------------------------------------------------------------------------------------------|-------|
| MGC23284     | NR_024399       | reflHomo sapiens hypothetical LOC197187 (MGC23284), transcript variant 2, non-coding RNA [NR_024399]                                           | 4,252 |
| DERL3        | NM_198440       | reflHomo sapiens Der1-like domain family, member 3 (DERL3), transcript variant 3, mRNA [NM_198440]                                             | 4,215 |
| THC2655811   | THC2655811      | Unknown                                                                                                                                        | 4,166 |
| PRDM2        | NM_012231       | reflHomo sapiens PR domain containing 2, with ZNF domain (PRDM2), transcript variant 1, mRNA [NM_012231]                                       | 4,164 |
| ITPKA        | NM_002220       | reflHomo sapiens inositol 1,4,5-trisphosphate 3-kinase A (ITPKA), mRNA [NM_002220]                                                             | 4,132 |
| CYR61        | NM_001554       | reflHomo sapiens cysteine-rich, angiogenic inducer, 61 (CYR61), mRNA [NM_001554]                                                               | 4,115 |
| WNT11        | NM_004626       | reflHomo sapiens wingless-type MMTV integration site family, member 11 (WNT11), mRNA [NM_004626]                                               | 4,096 |
| UNC5CL       | NM_173561       | reflHomo sapiens unc-5 homolog C (C. elegans)-like (UNC5CL), mRNA [NM_173561]                                                                  | 4,065 |
| CYP51A1      | NM_000786       | reflHomo sapiens cytochrome P450, family 51, subfamily A, polypeptide 1 (CYP51A1), mRNA [NM_000786]                                            | 4,057 |
| PIK3IP1      | NM_052880       | reflHomo sapiens phosphoinositide-3-kinase interacting protein 1 (PIK3IP1), transcript variant 1, mRNA [NM_052880]                             | 4,009 |
| IGDCC3       | NM_004884       | reflHomo sapiens immunoglobulin superfamily, DCC subclass, member 3 (IGDCC3), mRNA [NM_004884]                                                 | 3,990 |
| HIST2H2BE    | NM_003528       | reflHomo sapiens histone cluster 2, H2be (HIST2H2BE), mRNA [NM_003528]                                                                         | 3,982 |
| CYB5B        | NM_030579       | reflHomo sapiens cytochrome b5 type B (outer mitochondrial membrane) (CYB5B), nuclear gene encoding mitochondrial protein                      | 3,949 |
| ZNF720       | NM_001130913    | reflHomo sapiens zinc finger protein 720 (ZNF720), mRNA [NM_001130913]                                                                         | 3,924 |
| HIST1H1D     | NM_005320       | reflHomo sapiens histone cluster 1, H1d (HIST1H1D), mRNA [NM_005320]                                                                           | 3,905 |
| MMAB         | NM_052845       | reflHomo sapiens methylmalonic aciduria (cobalamin deficiency) cblB type (MMAB), nuclear gene encoding mitochondrial protein                   | 3,890 |
| LPIN1        | NM_145693       | reflHomo sapiens lipin 1 (LPIN1), mRNA [NM_145693]                                                                                             | 3,873 |
| SCARA5       | NM_173833       | reflHomo sapiens scavenger receptor class A, member 5 (putative) (SCARA5), mRNA [NM_173833]                                                    | 3,867 |
| TM7SF2       | NM_003273       | reflHomo sapiens transmembrane 7 superfamily member 2 (TM7SF2), mRNA [NM_003273]                                                               | 3,862 |
| OVPG1        | NM_002557       | reflHomo sapiens oviductal glycoprotein 1, 120kDa (OVPG1), mRNA [NM_002557]                                                                    | 3,815 |
| SERPINB8     | NM_001031848    | reflHomo sapiens serpin peptidase inhibitor, clade B (ovalbumin), member 8 (SERPINB8), transcript variant 3, mRNA [NM_001031848]               | 3,812 |
| LMO2         | NM_005574       | reflHomo sapiens LIM domain only 2 (rhombotin-like 1) (LMO2), transcript variant 1, mRNA [NM_005574]                                           | 3,807 |
| LMO2         | NM_005574       | reflHomo sapiens LIM domain only 2 (rhombotin-like 1) (LMO2), transcript variant 1, mRNA [NM_005574]                                           | 3,807 |
| BDNF         | NM_170735       | reflHomo sapiens brain-derived neurotrophic factor (BDNF), transcript variant 1, mRNA [NM_170735]                                              | 3,796 |
| TM9SF4       | NM_014742       | reflHomo sapiens transmembrane 9 superfamily protein member 4 (TM9SF4), mRNA [NM_014742]                                                       | 3,788 |
| TESC         | NM_017899       | reflHomo sapiens tescalcin (TESC), mRNA [NM_017899]                                                                                            | 3,779 |
| A_24_P196134 | A_24_P196134    | Unknown                                                                                                                                        | 3,777 |
| CYP51A1      | NM_000786       | reflHomo sapiens cytochrome P450, family 51, subfamily A, polypeptide 1 (CYP51A1), mRNA [NM_000786]                                            | 3,762 |
| JUN          | NM_002228       | reflHomo sapiens jun oncogene (JUN), mRNA [NM_002228]                                                                                          | 3,762 |
| CYR61        | NM_001554       | reflHomo sapiens cysteine-rich, angiogenic inducer, 61 (CYR61), mRNA [NM_001554]                                                               | 3,754 |
| SSTR2        | NM_001050       | reflHomo sapiens somatostatin receptor 2 (SSTR2), mRNA [NM_001050]                                                                             | 3,750 |
| JUN          | NM_002228       | reflHomo sapiens jun oncogene (JUN), mRNA [NM_002228]                                                                                          | 3,744 |
| PTGS2        | NM_000963       | reflHomo sapiens prostaglandin-endoperoxide synthase 2 (prostaglandin G/H synthase and cyclooxygenase) (PTGS2), mRNA [NM_000963]               | 3,741 |
| DNAJB6       | NM_058246       | reflHomo sapiens DnaJ (Hsp40) homolog, subfamily B, member 6 (DNAJB6), transcript variant 1, mRNA [NM_058246]                                  | 3,732 |
| MMAB         | NM_052845       | reflHomo sapiens methylmalonic aciduria (cobalamin deficiency) cblB type (MMAB), nuclear gene encoding mitochondrial protein                   | 3,729 |
| JUN          | NM_002228       | reflHomo sapiens jun oncogene (JUN), mRNA [NM_002228]                                                                                          | 3,722 |
| THC2665398   | THC2665398      | thc[Q5T0S6_HUMAN (Q5T0S6) Palmitoyl-protein thioesterase 1 (Ceroid-lipofuscinosis, neuronal 1, infantile) (Fragment), partial                  | 3,705 |
| SYNP02       | NM_001128933    | reflHomo sapiens synaptopodin 2 (SYNP02), transcript variant 2, mRNA [NM_001128933]                                                            | 3,703 |
| TDO2         | NM_005651       | reflHomo sapiens tryptophan 2,3-dioxygenase (TDO2), mRNA [NM_005651]                                                                           | 3,700 |
| ARMC9        | NM_025139       | reflHomo sapiens armadillo repeat containing 9 (ARMC9), mRNA [NM_025139]                                                                       | 3,699 |
| LOC150759    | AK057596        | gb Homo sapiens cDNA FLJ33034 fis, clone THYMU2002036. [AK057596]                                                                              | 3,660 |
| PTGS2        | NM_000963       | reflHomo sapiens prostaglandin-endoperoxide synthase 2 (prostaglandin G/H synthase and cyclooxygenase) (PTGS2), mRNA [NM_000963]               | 3,656 |
| YPEL2        | NM_001005404    | reflHomo sapiens yippee-like 2 (Drosophila) (YPEL2), mRNA [NM_001005404]                                                                       | 3,654 |
| JUN          | NM_002228       | reflHomo sapiens jun oncogene (JUN), mRNA [NM_002228]                                                                                          | 3,628 |
| JUN          | NM_002228       | reflHomo sapiens jun oncogene (JUN), mRNA [NM_002228]                                                                                          | 3,613 |
| LMO2         | NM_005574       | reflHomo sapiens LIM domain only 2 (rhombotin-like 1) (LMO2), transcript variant 1, mRNA [NM_005574]                                           | 3,589 |
| SLC35F1      | NM_001029858    | reflHomo sapiens solute carrier family 35, member F1 (SLC35F1), mRNA [NM_001029858]                                                            | 3,586 |
| NR2F1        | NM_005654       | reflHomo sapiens nuclear receptor subfamily 2, group F, member 1 (NR2F1), mRNA [NM_005654]                                                     | 3,578 |
| THC2577566   | THC2577566      | Unknown                                                                                                                                        | 3,572 |
| JUN          | NM_002228       | reflHomo sapiens jun oncogene (JUN), mRNA [NM_002228]                                                                                          | 3,560 |
| PPF1BP1      | NM_177444       | reflHomo sapiens PTPRF interacting protein, binding protein 1 (liprin beta 1) (PPF1BP1), transcript variant 2, mRNA [NM_177444]                | 3,530 |
| PTGS2        | NM_000963       | reflHomo sapiens prostaglandin-endoperoxide synthase 2 (prostaglandin G/H synthase and cyclooxygenase) (PTGS2), mRNA [NM_000963]               | 3,518 |
| JUN          | NM_002228       | reflHomo sapiens jun oncogene (JUN), mRNA [NM_002228]                                                                                          | 3,517 |
| JUN          | NM_002228       | reflHomo sapiens jun oncogene (JUN), mRNA [NM_002228]                                                                                          | 3,502 |
| WFIKKN1      | NM_053284       | reflHomo sapiens WAP, follistatin/kazal, immunoglobulin, kunitz and netrin domain containing 1 (WFIKKN1), mRNA [NM_053284]                     | 3,486 |
| JUN          | NM_002228       | reflHomo sapiens jun oncogene (JUN), mRNA [NM_002228]                                                                                          | 3,478 |
| JUN          | NM_002228       | reflHomo sapiens jun oncogene (JUN), mRNA [NM_002228]                                                                                          | 3,463 |
| ZNF425       | NM_001001661    | reflHomo sapiens zinc finger protein 425 (ZNF425), mRNA [NM_001001661]                                                                         | 3,461 |
| HBP1         | NM_012257       | reflHomo sapiens HMG-box transcription factor 1 (HBP1), mRNA [NM_012257]                                                                       | 3,461 |
| MAP2         | NM_002374       | reflHomo sapiens microtubule-associated protein 2 (MAP2), transcript variant 1, mRNA [NM_002374]                                               | 3,461 |
| BASP1        | NM_006317       | reflHomo sapiens brain abundant, membrane attached signal protein 1 (BASP1), mRNA [NM_006317]                                                  | 3,459 |
| AF087999     | AF087999        | gb Homo sapiens full length insert cDNA clone YX44E03. [AF087999]                                                                              | 3,452 |
| GPR35        | NM_005301       | reflHomo sapiens G protein-coupled receptor 35 (GPR35), mRNA [NM_005301]                                                                       | 3,451 |
| ZNF75D       | NM_007131       | reflHomo sapiens zinc finger protein 75D (ZNF75D), mRNA [NM_007131]                                                                            | 3,434 |
| AOC3         | NM_003734       | reflHomo sapiens amine oxidase, copper containing 3 (vascular adhesion protein 1) (AOC3), mRNA [NM_003734]                                     | 3,424 |
| ZNF264       | NM_003417       | reflHomo sapiens zinc finger protein 264 (ZNF264), mRNA [NM_003417]                                                                            | 3,417 |
| TMEM97       | NM_014573       | reflHomo sapiens transmembrane protein 97 (TMEM97), mRNA [NM_014573]                                                                           | 3,412 |
| TP53         | NM_000546       | reflHomo sapiens tumor protein p53 (TP53), transcript variant 1, mRNA [NM_000546]                                                              | 3,403 |
| TP53         | NM_000546       | reflHomo sapiens tumor protein p53 (TP53), transcript variant 1, mRNA [NM_000546]                                                              | 3,396 |
| LMO2         | NM_005574       | reflHomo sapiens LIM domain only 2 (rhombotin-like 1) (LMO2), transcript variant 1, mRNA [NM_005574]                                           | 3,393 |
| LMO2         | NM_005574       | reflHomo sapiens LIM domain only 2 (rhombotin-like 1) (LMO2), transcript variant 1, mRNA [NM_005574]                                           | 3,388 |
| MXD1         | NM_002357       | reflHomo sapiens MAX dimerization protein 1 (MXD1), mRNA [NM_002357]                                                                           | 3,365 |
| YPEL2        | NM_001005404    | reflHomo sapiens yippee-like 2 (Drosophila) (YPEL2), mRNA [NM_001005404]                                                                       | 3,351 |
| CTSK         | NM_000396       | reflHomo sapiens cathepsin K (CTSK), mRNA [NM_000396]                                                                                          | 3,350 |
| TMEM97       | NM_014573       | reflHomo sapiens transmembrane protein 97 (TMEM97), mRNA [NM_014573]                                                                           | 3,337 |
| TMEM97       | NM_014573       | reflHomo sapiens transmembrane protein 97 (TMEM97), mRNA [NM_014573]                                                                           | 3,335 |
| DOCK4        | NM_014705       | reflHomo sapiens dedicator of cytokinesis 4 (DOCK4), mRNA [NM_014705]                                                                          | 3,333 |
| RNF20        | NM_019592       | reflHomo sapiens ring finger protein 20 (RNF20), mRNA [NM_019592]                                                                              | 3,324 |
| HIST1H2AC    | ENST00000314088 | ens Histone H2A type 1-C (H2A1) [Source:UniProtKB/Swiss-Prot;Acc:Q93077] [ENST00000314088]                                                     | 3,302 |
| RDH16        | NM_003708       | reflHomo sapiens retinol dehydrogenase 16 (all-trans) (RDH16), mRNA [NM_003708]                                                                | 3,301 |
| SC5DL        | NM_001024956    | reflHomo sapiens sterol-C5-desaturase (ERG3 delta-5-desaturase homolog, S. cerevisiae)-like (SC5DL), transcript variant 2, mRNA [NM_001024956] | 3,292 |
| GNG11        | NM_004126       | reflHomo sapiens guanine nucleotide binding protein (G protein), gamma 11 (GNG11), mRNA [NM_004126]                                            | 3,290 |
| PLAUR        | NM_001005377    | reflHomo sapiens plasminogen activator, urokinase receptor (PLAUR), transcript variant 3, mRNA [NM_001005377]                                  | 3,273 |
| GREM2        | NM_022469       | reflHomo sapiens gremlin 2, cysteine knot superfamily, homolog (Xenopus laevis) (GREM2), mRNA [NM_022469]                                      | 3,273 |
| PTGER4       | NM_000958       | reflHomo sapiens prostaglandin E receptor 4 (subtype EP4) (PTGER4), mRNA [NM_000958]                                                           | 3,271 |
| IL8          | NM_000584       | reflHomo sapiens interleukin 8 (IL8), mRNA [NM_000584]                                                                                         | 3,264 |
| LMO2         | NM_005574       | reflHomo sapiens LIM domain only 2 (rhombotin-like 1) (LMO2), transcript variant 1, mRNA [NM_005574]                                           | 3,261 |
| TMEM81       | NM_203376       | reflHomo sapiens transmembrane protein 81 (TMEM81), mRNA [NM_203376]                                                                           | 3,253 |
| FRG2         | NM_001005217    | reflHomo sapiens FSHD region gene 2 (FRG2), mRNA [NM_001005217]                                                                                | 3,236 |
| BX107298     | BX107298        | gb BX107298 Soares_testis_NHT Homo sapiens cDNA clone IMAGp998N011789, mRNA sequence [BX107298]                                                | 3,227 |
| TFPI         | NM_006287       | reflHomo sapiens tissue factor pathway inhibitor (lipoprotein-associated coagulation inhibitor) (TFPI), transcript variant 1, mRNA [NM_006287] | 3,183 |
| ADAM8        | NM_001109       | reflHomo sapiens ADAM metalloproteinase domain 8 (ADAM8), mRNA [NM_001109]                                                                     | 3,179 |
| CR596670     | CR596670        | gb full-length cDNA clone CS0DF018YM18 of Fetal brain of Homo sapiens (human). [CR596670]                                                      | 3,173 |
| CLCN6        | NM_001286       | reflHomo sapiens chloride channel 6 (CLCN6), transcript variant C1C-6a, mRNA [NM_001286]                                                       | 3,171 |
| ERO1LB       | NM_019891       | reflHomo sapiens ERO1-like beta (S. cerevisiae) (ERO1LB), mRNA [NM_019891]                                                                     | 3,150 |
| TMEFF2       | AB004064        | gb Homo sapiens mRNA for tomogreulin, complete cds. [AB004064]                                                                                 | 3,149 |
| SC5DL        | NM_001024956    | reflHomo sapiens sterol-C5-desaturase (ERG3 delta-5-desaturase homolog, S. cerevisiae)-like (SC5DL), transcript variant 2, mRNA [NM_001024956] | 3,142 |
| PTGS2        | NM_000963       | reflHomo sapiens prostaglandin-endoperoxide synthase 2 (prostaglandin G/H synthase and cyclooxygenase) (PTGS2), mRNA [NM_000963]               | 3,132 |
| PDGFA        | NM_002607       | reflHomo sapiens platelet-derived growth factor alpha polypeptide (PDGFA), transcript variant 1, mRNA [NM_002607]                              | 3,112 |
| HBP1         | NM_012257       | reflHomo sapiens HMG-box transcription factor 1 (HBP1), mRNA [NM_012257]                                                                       | 3,110 |
| C17orf59     | NM_017622       | reflHomo sapiens chromosome 17 open reading frame 59 (C17orf59), mRNA [NM_017622]                                                              | 3,105 |
| MXD1         | NM_002357       | reflHomo sapiens MAX dimerization protein 1 (MXD1), mRNA [NM_002357]                                                                           | 3,090 |
| SCHIP1       | NM_014575       | reflHomo sapiens schwannomin interacting protein 1 (SCHIP1), mRNA [NM_014575]                                                                  | 3,086 |
| AA593970     | AA593970        | gb AA593970 nn01c05.s1 NCL_CGAP_Co9 Homo sapiens cDNA clone IMAGE:1076456 3', mRNA sequence [AA593970]                                         | 3,073 |
| FASN         | NM_004104       | reflHomo sapiens fatty acid synthase (FASN), mRNA [NM_004104]                                                                                  | 3,071 |

|                 |                 |                                                                                                                                  |       |
|-----------------|-----------------|----------------------------------------------------------------------------------------------------------------------------------|-------|
| GOLGB1          | NM_004487       | ref Homo sapiens golgin B1, golgi integral membrane protein (GOLGB1), mRNA [NM_004487]                                           | 3,057 |
| TMEM49          | BC024020        | gb Homo sapiens transmembrane protein 49, mRNA (cDNA clone IMAGE:4295896), with apparent retained intron. [BC024020]             | 3,056 |
| PLA2G4C         | NM_003706       | ref Homo sapiens phospholipase A2, group IVC (cytosolic, calcium-independent) (PLA2G4C), mRNA [NM_003706]                        | 3,056 |
| ENST00000298876 | ENST00000298876 | ens Uncharacterized protein C12orf70 [Source:UniProtKB/Swiss-Prot;Acc:A6NFE2] [ENST00000298876]                                  | 3,048 |
| GADD45A         | NM_001924       | ref Homo sapiens growth arrest and DNA-damage-inducible, alpha (GADD45A), mRNA [NM_001924]                                       | 3,039 |
| C4orf18         | NM_016613       | ref Homo sapiens chromosome 4 open reading frame 18 (C4orf18), transcript variant 2, mRNA [NM_016613]                            | 3,032 |
| AMOTL2          | NM_016201       | ref Homo sapiens angiostatin like 2 (AMOTL2), mRNA [NM_016201]                                                                   | 3,028 |
| ADAMTS1         | NM_006988       | ref Homo sapiens ADAM metalloproteinase with thrombospondin type 1 motif, 1 (ADAMTS1), mRNA [NM_006988]                          | 3,021 |
| CASP4           | NM_033306       | ref Homo sapiens caspase 4, apoptosis-related cysteine peptidase (CASP4), transcript variant gamma, mRNA [NM_033306]             | 3,015 |
| TM7SF2          | NM_003273       | ref Homo sapiens transmembrane 7 superfamily member 2 (TM7SF2), mRNA [NM_003273]                                                 | 3,012 |
| NXN             | NM_022463       | ref Homo sapiens nucleoredoxin (NXN), mRNA [NM_022463]                                                                           | 3,009 |
| AK022044        | AK022044        | gb Homo sapiens cDNA FLJ11982 fis, clone HEMBB1001335. [AK022044]                                                                | 3,006 |
| C17orf59        | NM_017622       | ref Homo sapiens chromosome 17 open reading frame 59 (C17orf59), mRNA [NM_017622]                                                | 2,995 |
| HOXB3           | NM_002146       | ref Homo sapiens homeobox B3 (HOXB3), mRNA [NM_002146]                                                                           | 2,976 |
| ABCB1           | NM_000927       | ref Homo sapiens ATP-binding cassette, sub-family B (MDR/TAP), member 1 (ABCB1), mRNA [NM_000927]                                | 2,975 |
| ABCB1           | NM_000927       | ref Homo sapiens ATP-binding cassette, sub-family B (MDR/TAP), member 1 (ABCB1), mRNA [NM_000927]                                | 2,968 |
| FAM132A         | NM_001014980    | ref Homo sapiens family with sequence similarity 132, member A (FAM132A), mRNA [NM_001014980]                                    | 2,959 |
| CUL4B           | NM_003588       | ref Homo sapiens cullin 4B (CUL4B), transcript variant 1, mRNA [NM_003588]                                                       | 2,955 |
| GGPS1           | NM_004837       | ref Homo sapiens geranylgeranyl diphosphate synthase 1 (GGPS1), transcript variant 1, mRNA [NM_004837]                           | 2,952 |
| ABCB1           | NM_000927       | ref Homo sapiens ATP-binding cassette, sub-family B (MDR/TAP), member 1 (ABCB1), mRNA [NM_000927]                                | 2,952 |
| PTGS2           | NM_000963       | ref Homo sapiens prostaglandin-endoperoxide synthase 2 (prostaglandin G/H synthase and cyclooxygenase) (PTGS2), mRNA [NM_000963] | 2,944 |
| ERO1LB          | NM_019891       | ref Homo sapiens ERO1-like beta (S. cerevisiae) (ERO1LB), mRNA [NM_019891]                                                       | 2,939 |
| THC275690       | THC275690       | Unknown                                                                                                                          | 2,916 |
| SOC2            | NM_003877       | ref Homo sapiens suppressor of cytokine signaling 2 (SOC2), mRNA [NM_003877]                                                     | 2,908 |
| FAM100B         | NM_182565       | ref Homo sapiens family with sequence similarity 100, member B (FAM100B), mRNA [NM_182565]                                       | 2,904 |
| ANKRD42         | NM_182603       | ref Homo sapiens ankyrin repeat domain 42 (ANKRD42), mRNA [NM_182603]                                                            | 2,902 |
| GADD45B         | NM_015675       | ref Homo sapiens growth arrest and DNA-damage-inducible, beta (GADD45B), mRNA [NM_015675]                                        | 2,899 |
| LOC100130910    | XM_001715202    | gb PREDICTED: Homo sapiens hypothetical protein LOC100130910 (LOC100130910), mRNA [XM_001715202]                                 | 2,894 |
| ACLY            | U18197          | gb Human ATP-citrate lyase mRNA, complete cds. [U18197]                                                                          | 2,891 |
| MANBAL          | NM_022077       | ref Homo sapiens mannosidase, beta A, lysosomal-like (MANBAL), transcript variant 1, mRNA [NM_022077]                            | 2,864 |
| SORBS2          | AF090937        | gb Homo sapiens clone HQ0618 PRO0618 mRNA, complete cds. [AF090937]                                                              | 2,862 |
| CASP4           | NM_033306       | ref Homo sapiens caspase 4, apoptosis-related cysteine peptidase (CASP4), transcript variant gamma, mRNA [NM_033306]             | 2,852 |
| HCG18           | NR_024052       | ref Homo sapiens HLA complex group 18 (HCG18), non-coding RNA [NR_024052]                                                        | 2,850 |
| ABCB1           | NM_000927       | ref Homo sapiens ATP-binding cassette, sub-family B (MDR/TAP), member 1 (ABCB1), mRNA [NM_000927]                                | 2,834 |
| KIAA1875        | NR_024207       | ref Homo sapiens KIAA1875 (KIAA1875), non-coding RNA [NR_024207]                                                                 | 2,829 |
| TXK             | NM_003328       | ref Homo sapiens TXK tyrosine kinase (TXK), mRNA [NM_003328]                                                                     | 2,818 |
| ENST00000379619 | ENST00000379619 | ens Fos-related antigen 2 [Source:UniProtKB/Swiss-Prot;Acc:P15408] [ENST00000379619]                                             | 2,809 |
| GOLGB1          | X75304          | gb H. sapiens giantin mRNA. [X75304]                                                                                             | 2,808 |
| TMCO3           | NM_017905       | ref Homo sapiens transmembrane and coiled-coil domains 3 (TMCO3), mRNA [NM_017905]                                               | 2,802 |
| THC2682560      | THC2682560      | Unknown                                                                                                                          | 2,801 |
| PGD             | NM_002631       | ref Homo sapiens phosphogluconate dehydrogenase (PGD), mRNA [NM_002631]                                                          | 2,800 |
| THC2739352      | THC2739352      | thc Q3GZE6_9ACTO (Q3GZE6) AAA ATPase, central region, partial (3%) [THC2739352]                                                  | 2,793 |
| HACL1           | NM_012260       | ref Homo sapiens 2-hydroxyacyl-CoA lyase 1 (HACL1), mRNA [NM_012260]                                                             | 2,782 |
| C5orf26         | NR_015370       | ref Homo sapiens chromosome 5 open reading frame 26 (C5orf26), non-coding RNA [NR_015370]                                        | 2,777 |
| MC5R            | NM_005913       | ref Homo sapiens melanocortin 5 receptor (MC5R), mRNA [NM_005913]                                                                | 2,776 |
| ERICH1          | NM_207332       | ref Homo sapiens glutamate-rich 1 (ERICH1), mRNA [NM_207332]                                                                     | 2,759 |
| PRDM10          | NM_199437       | ref Homo sapiens PR domain containing 10 (PRDM10), transcript variant 2, mRNA [NM_199437]                                        | 2,754 |
| KLC1            | NM_182923       | ref Homo sapiens kinesin light chain 1 (KLC1), transcript variant 2, mRNA [NM_182923]                                            | 2,749 |
| ABCB1           | NM_000927       | ref Homo sapiens ATP-binding cassette, sub-family B (MDR/TAP), member 1 (ABCB1), mRNA [NM_000927]                                | 2,745 |
| LSS             | NM_002340       | ref Homo sapiens lanosterol synthase (2,3-oxidosqualene-lanosterol cyclase) (LSS), transcript variant 1, mRNA [NM_002340]        | 2,729 |
| RP4-691N24.1    | NM_025176       | ref Homo sapiens ninein-like (NLP), mRNA [NM_025176]                                                                             | 2,718 |
| ABCB1           | NM_000927       | ref Homo sapiens ATP-binding cassette, sub-family B (MDR/TAP), member 1 (ABCB1), mRNA [NM_000927]                                | 2,706 |
| JUND            | X56681          | gb Human junD mRNA. [X56681]                                                                                                     | 2,693 |
| SKAP1           | NM_003726       | ref Homo sapiens src kinase associated phosphoprotein 1 (SKAP1), transcript variant 1, mRNA [NM_003726]                          | 2,681 |
| AUH             | NM_001698       | ref Homo sapiens AU RNA binding protein/enoyl-Coenzyme A hydratase (AUH), nuclear gene encoding mitochondrial protein, m         | 2,666 |
| ANKRD11         | NM_013275       | ref Homo sapiens ankyrin repeat domain 11 (ANKRD11), mRNA [NM_013275]                                                            | 2,666 |
| CELSR3          | NM_001407       | ref Homo sapiens cadherin, EGF LAG seven-pass G-type receptor 3 (flamingo homolog, Drosophila) (CELSR3), mRNA [NM_001407]        | 2,656 |
| LRRIQ1          | NM_032165       | ref Homo sapiens leucine-rich repeats and IQ motif containing 1 (LRRIQ1), transcript variant 2, mRNA [NM_032165]                 | 2,639 |
| THC2656875      | THC2656875      | Unknown                                                                                                                          | 2,638 |
| DEPDC6          | NM_022783       | ref Homo sapiens DEP domain containing 6 (DEPDC6), mRNA [NM_022783]                                                              | 2,620 |
| PNPLA3          | NM_025225       | ref Homo sapiens patatin-like phospholipase domain containing 3 (PNPLA3), mRNA [NM_025225]                                       | 2,581 |
| LOC92270        | NM_001017971    | ref Homo sapiens V-type proton ATPase subunit S1-like protein (LOC92270), mRNA [NM_001017971]                                    | 2,579 |
| RASSF1          | NM_170713       | ref Homo sapiens Ras association (RalGDS/AF-6) domain family member 1 (RASSF1), transcript variant C, mRNA [NM_170713]           | 2,574 |
| LOC153546       | AK055939        | gb Homo sapiens cDNA FLJ31377 fis, clone NESOP1000087. [AK055939]                                                                | 2,574 |
| ANKRD42         | NM_182603       | ref Homo sapiens ankyrin repeat domain 42 (ANKRD42), mRNA [NM_182603]                                                            | 2,559 |
| BX100171        | BX100171        | gb BX100171 Soares_testis_NHT Homo sapiens cDNA clone IMAGp998C011795, mRNA sequence [BX100171]                                  | 2,529 |
